# Supplementary material
Source: PubMed Central journal article supplement (PMC4335351)
Supplement: NIHMS654366-supplement-1.pdf [file NIHMS654366-supplement-1.pdf]

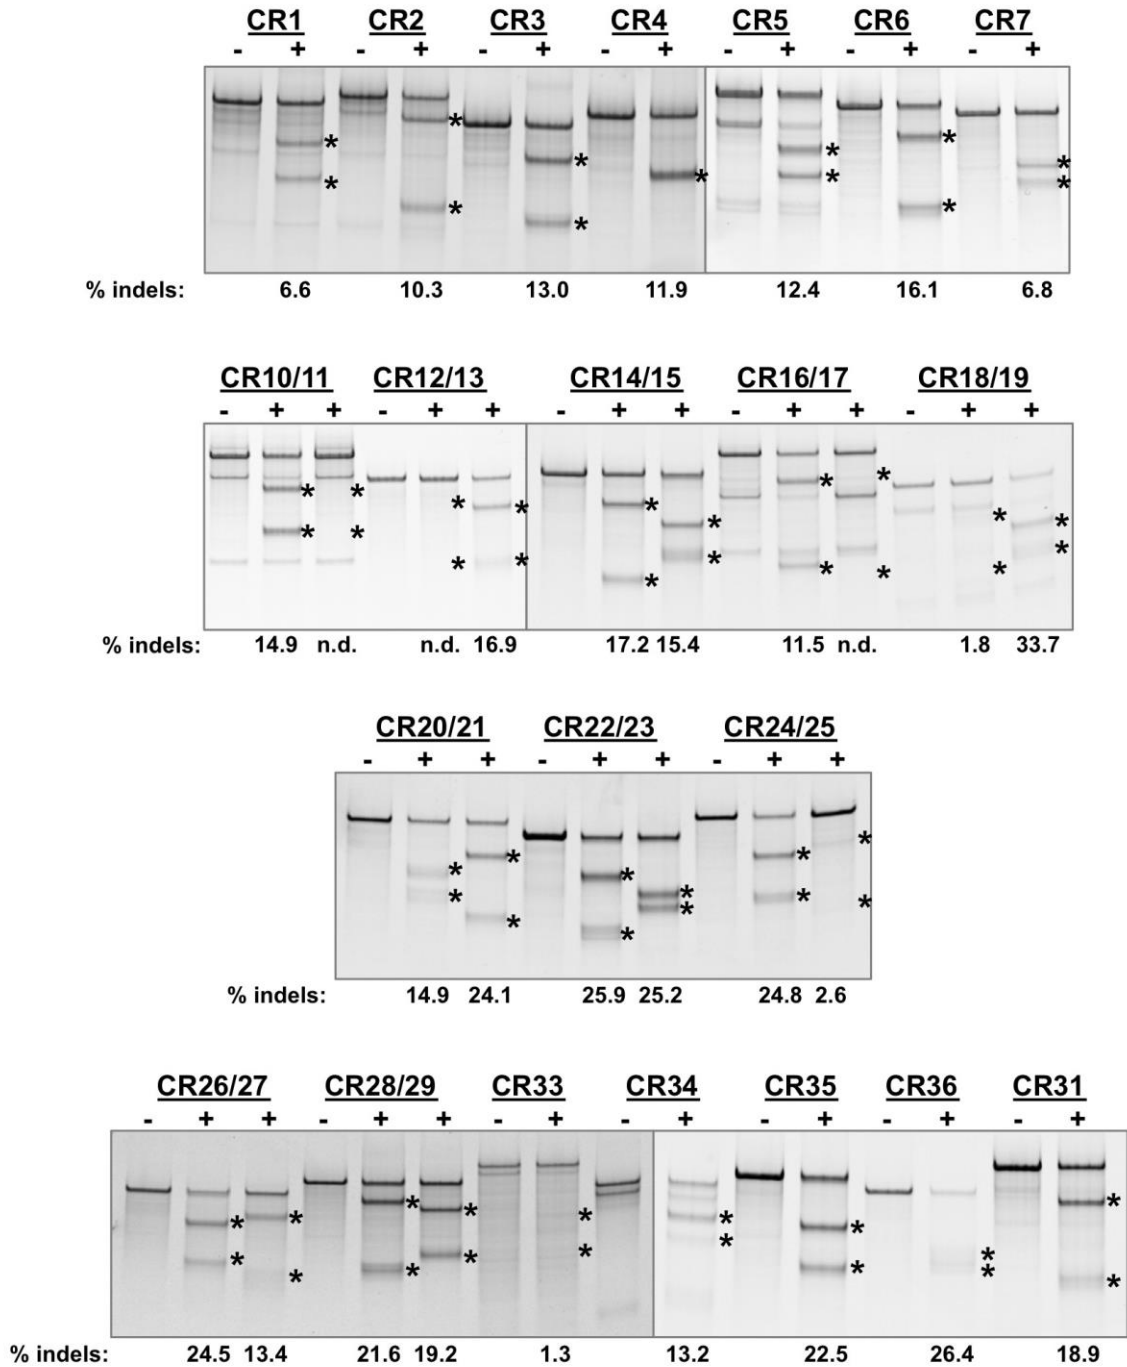

**Supplementary Figure 1:** Images of TBE-PAGE gels used to quantify Surveyor assay results to measure day 3 gene modification in Table 1. Asterisks mark expected sizes of bands indicative of nuclease activity.

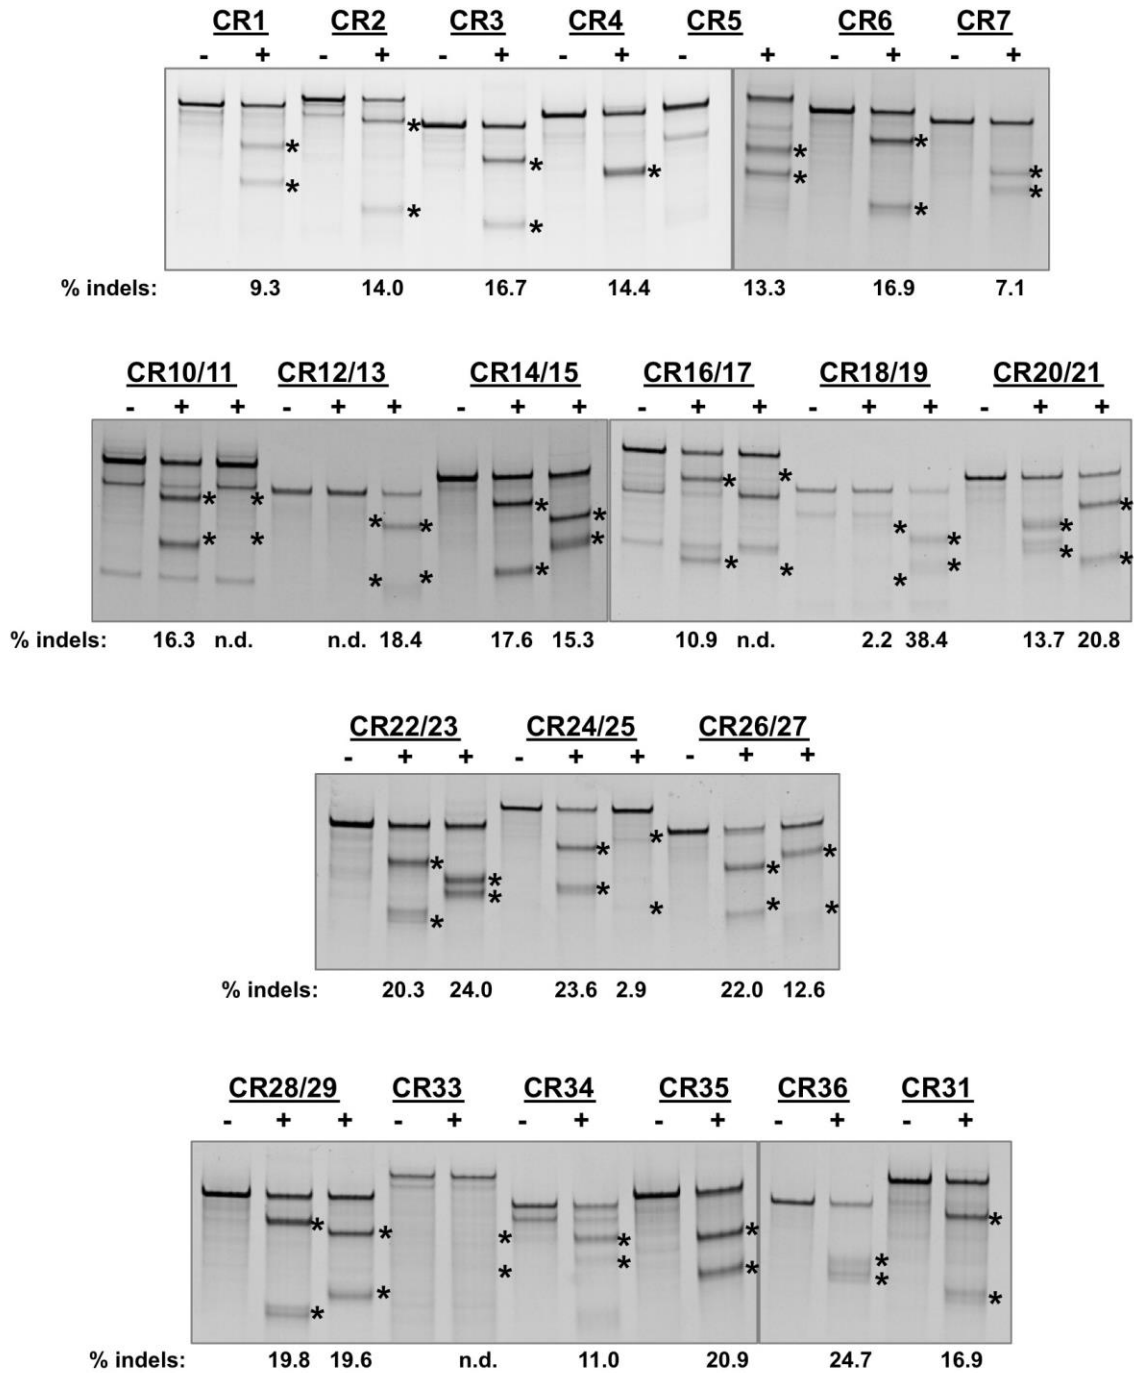

**Supplementary Figure 2:** Images of TBE-PAGE gels used to quantify Surveyor assay results to measure day 10 gene modification in Table 1. Asterisks mark expected sizes of bands indicative of nuclease activity.

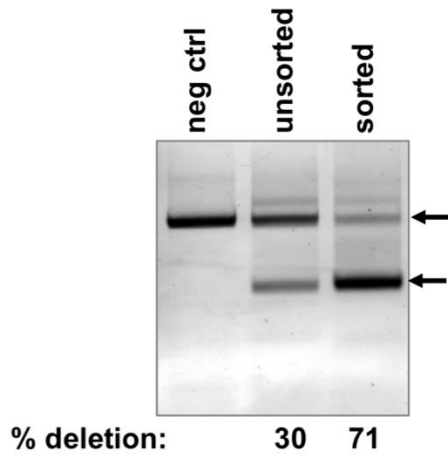

**Supplementary Figure 3:** Verification of flow cytometry-based enrichment of gene-modified DMD myoblasts used for *in vivo* cell transplantation experiment. DMD myoblasts were treated with Cas9 with or without sgRNA expression vectors for CR1 and CR5 and sorted for GFP+ cells by flow cytometry. Deletions at the exon 51 locus were detected by end-point PCR using primers flanking the locus. Neg ctrl: DMD myoblasts treated with Cas9 only and sorted for GFP+ cells.

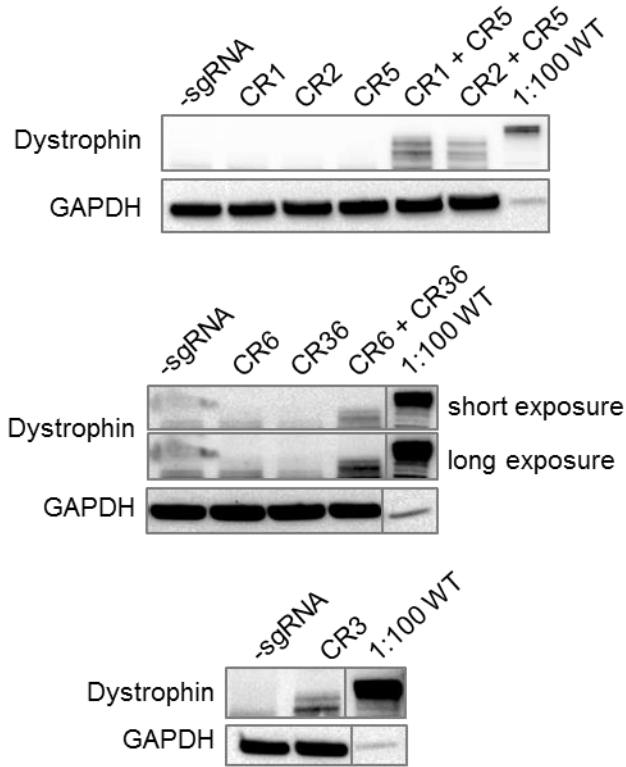

**Supplementary Figure 4:** Dystrophin western blots including wild-type controls. The western blots from Figures 3D, 4D, and 5D all included lysate from differentiated wild-type human skeletal myoblasts, diluted 1:100, on the same gel. Importantly, these wild-type cells were independently isolated and not controlled for muscle group, patient age or health, or passage number, and therefore have different capacity for *in vitro* differentiation. Furthermore, these wild-type cells did not undergo plasmid electroporation and cell sorting. For all of these reasons, it is not accurate to compare dystrophin levels between these cell sources. Nevertheless, the wild-type control confirms the ability to detect the edited dystrophin protein product at the correct size, slightly smaller than the wild-type band due to the deleted exons.

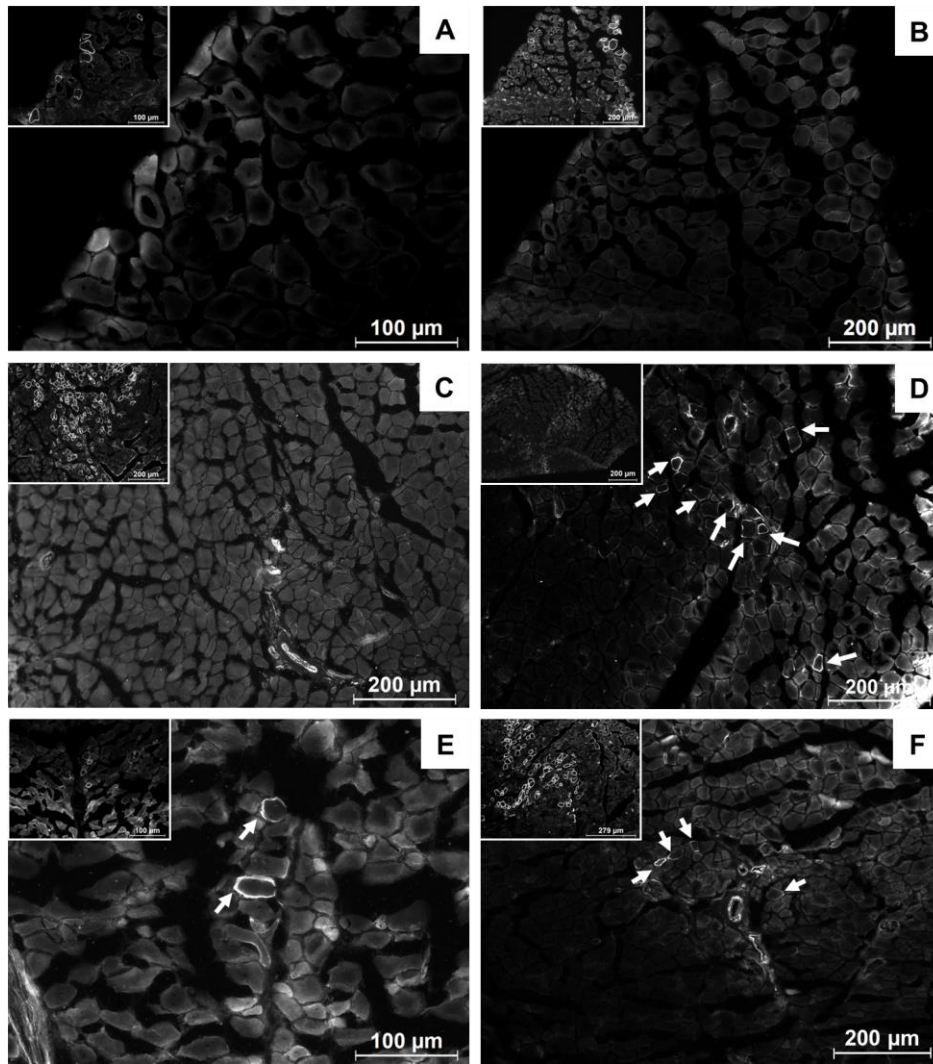

**Supplementary Figure 5:** Additional immunofluorescence images probing human dystrophin expression. Serial sections from regions stained with anti-human spectrin are shown inset in top left. (A-C) Sections from muscles injected with untreated human DMD myoblasts. (D-F) Sections from muscles injected with CR1/5 treated human DMD myoblasts enriched by flow cytometry. White arrows indicate dystrophin positive fibers.

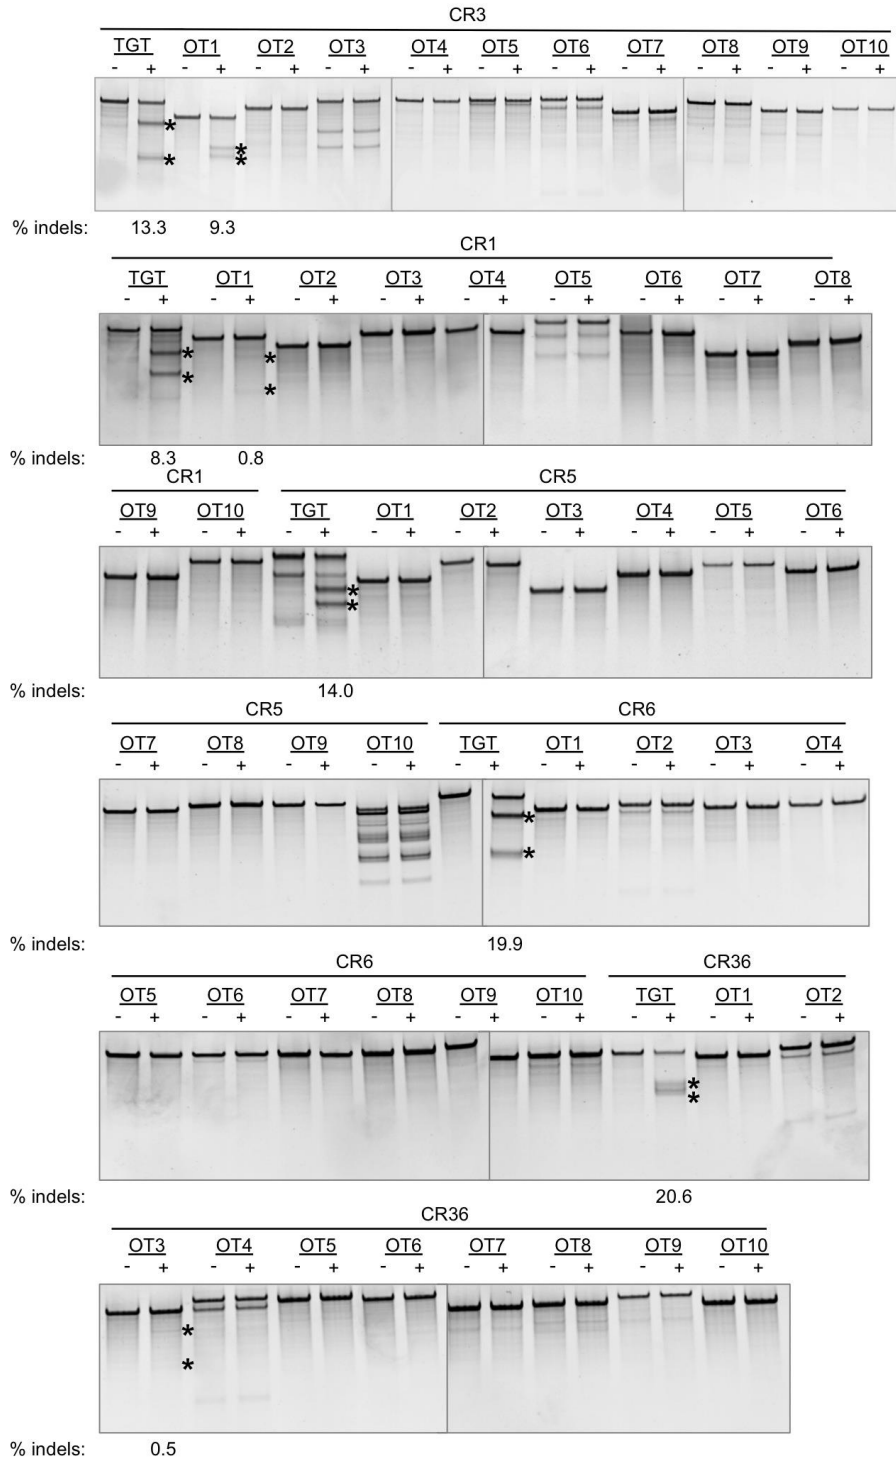

**Supplementary Figure 6** - Images of TBE-PAGE gels used to quantify Surveyor assay results to measure on-target and off-target gene modification in Supplementary Table 2. Asterisks mark expected sizes of bands indicative of nuclease activity.

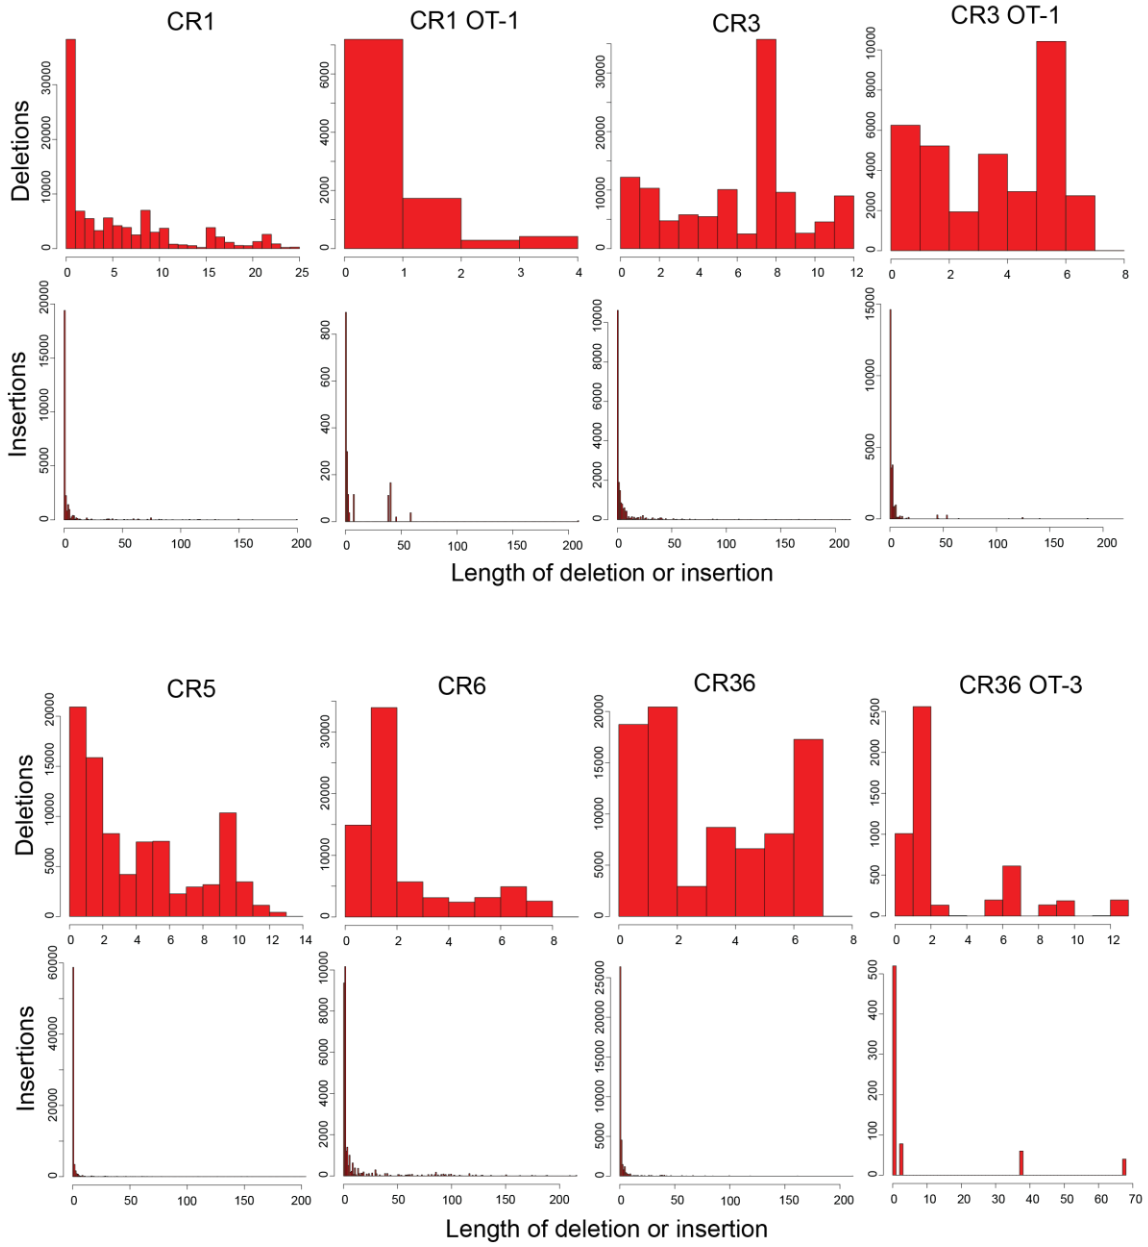

**Supplementary Figure 7** – Distribution of indel size in HEK293T cells treated with Cas9 and the indicated sgRNA as determined by deep sequencing.

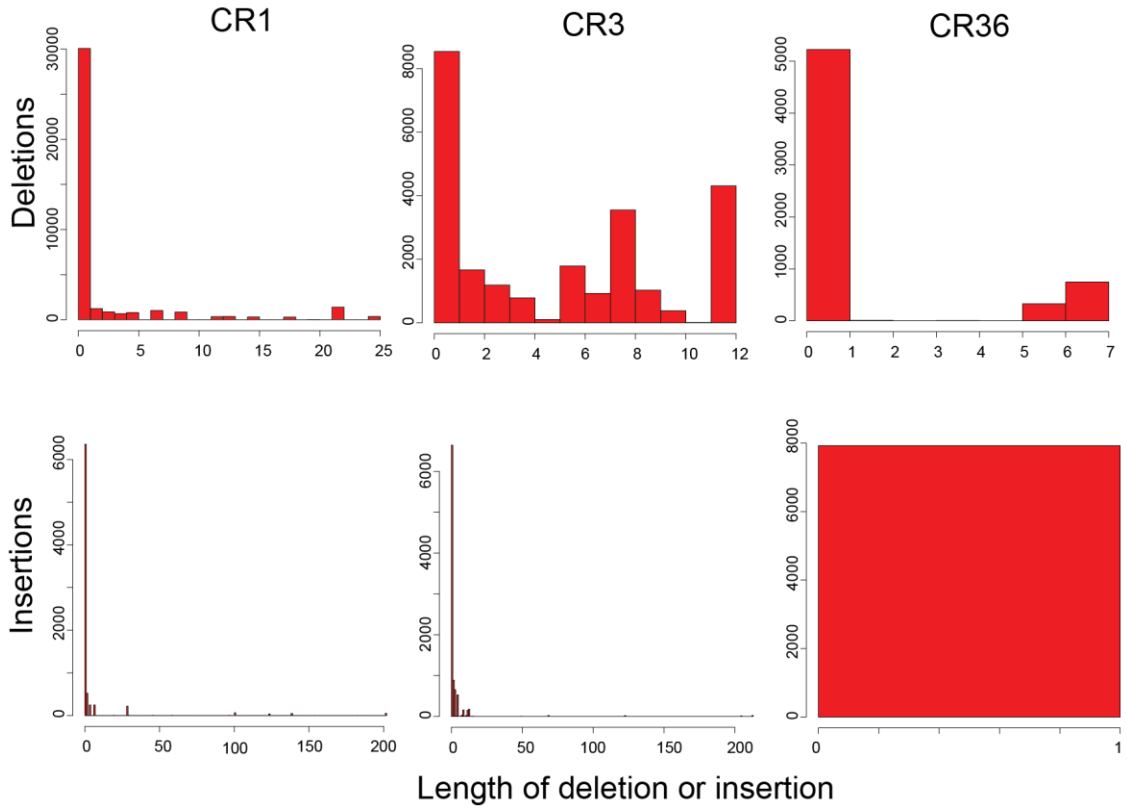

**Supplementary Figure 8** – Distribution of indel size in DMD myoblasts treated with Cas9 and the indicated sgRNA as determined by deep sequencing.



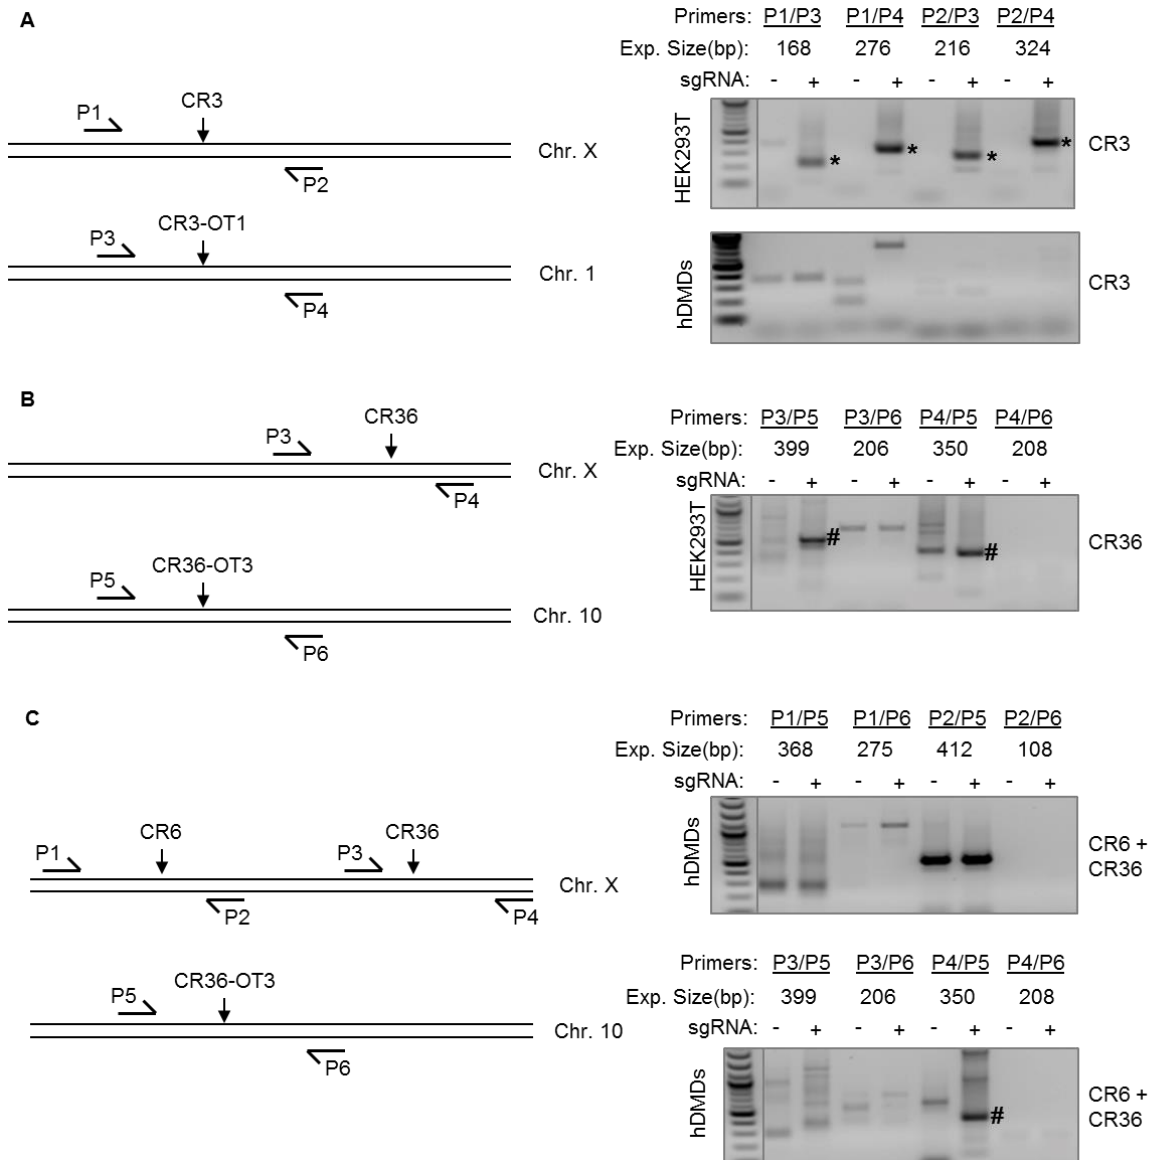

**Supplementary Figure 9 – End-point nested PCR to detect chromosomal translocations caused by CRISPR/Cas9 off-target activity for CR3 and CR6/CR36 in human cells.** Nested end-point PCR analysis was used to detect translocations in (A) HEK293T or sorted hDMD cells treated with Cas9 and CR3 as indicated, (B) HEK293T cells treated with Cas9 and CR36 alone, or (C) sorted hDMD cells treated with Cas9, CR6, and CR36 expression cassettes. The second nested PCR reaction for translocation was amplified using custom primers for each predicted translocation locus to maximize specificity (See Supplementary Table 2). The schematic depicts the relative location of nested primer pairs used to probe for the presence of translocations. Each possible translocation event was first amplified from genomic DNA isolated from cells treated with or without the indicated sgRNA(s). A second nested PCR reaction was performed using primers within the predicted PCR amplicons that would result from translocations. Expected size was estimated based on the indicated primer binding site and the predicted sgRNA cut site at each locus. \*indicates bands detected at the expected size and verified by Sanger sequencing from each end. #indicates amplicons in which Sanger sequencing showed sequences other than the predicted translocation, likely a result of mispriming during the nested PCR.

**P1/P3 band**

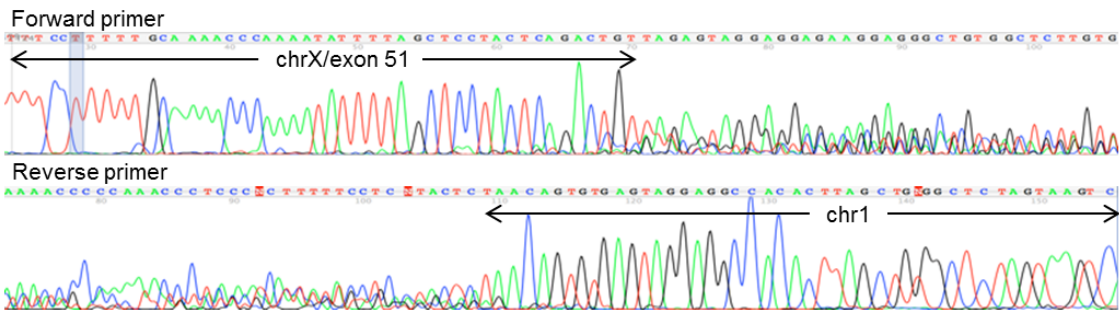

**P1/P4 band**

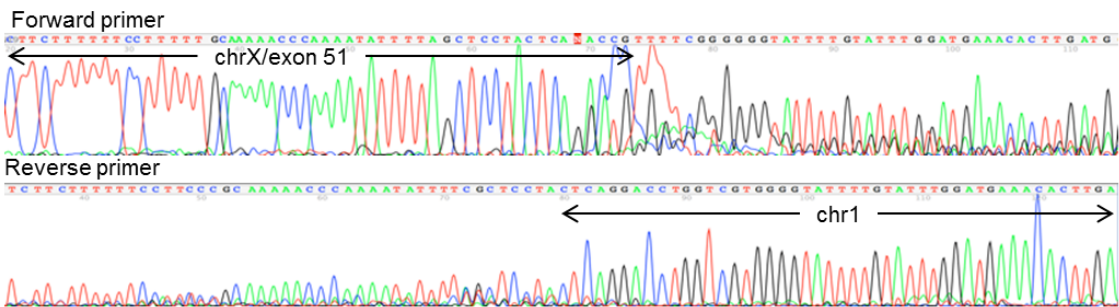

**P2/P3 band**

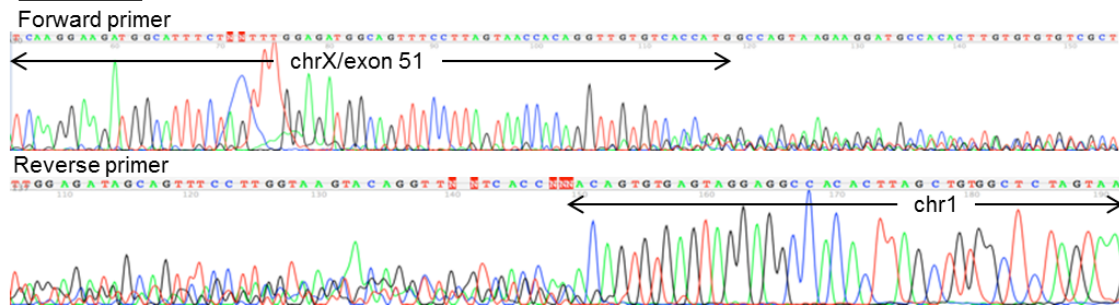

**P2/P4 band**

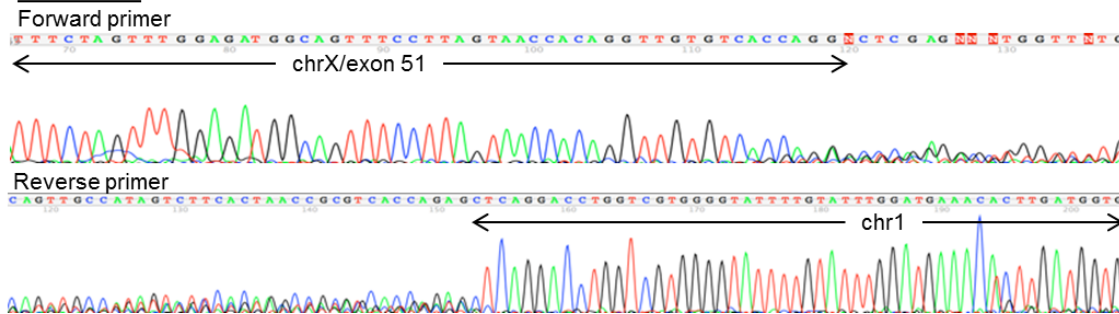

**Supplementary Figure 10-** Sanger sequencing chromatograms for bands detected in Supplementary Figure 9 resulting from translocations between CR3 and CR3-OT1, on chromosomes X and 1, respectively, in HEK293T cells treated with Cas9 and CR3 gene cassettes. Arrows show regions of homology to the indicated chromosome nearby the expected break points caused by the appropriate sgRNAs. Note that sequencing reads become out of phase near the break point due to the error-prone nature of DNA repair by non-homologous end-joining.

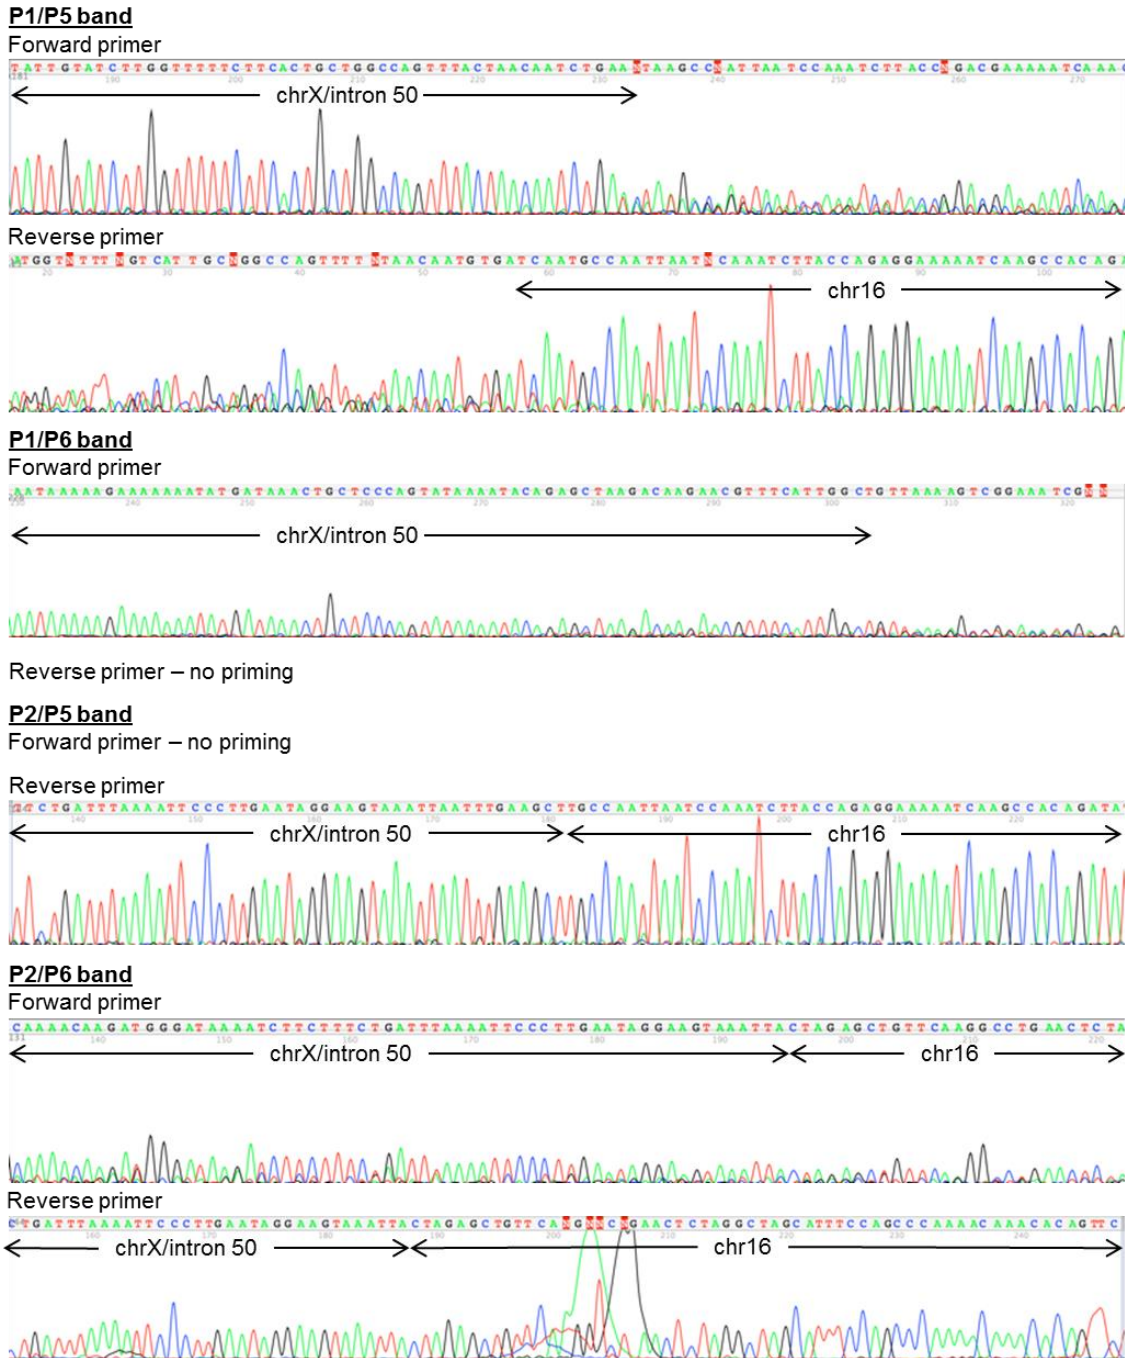

**Supplementary Figure 11** - Sanger sequencing chromatograms for bands detected in Figure 7C resulting from translocations between CR1 and CR1-OT1, on chromosomes X and 16, respectively, in HEK293T cells treated with Cas9 and CR1 gene cassettes. Arrows show regions of homology to the indicated chromosome nearby the expected break points caused by the appropriate sgRNAs. Note that sequencing reads become out of phase near the break point due to the error-prone nature of DNA repair by non-homologous end-joining.

gccaccATGGACAAGAAGTACTCCATTGGGCTCGATATCGGCACAAACAGCGTCGGCTGGGCGTCATTACGGACGAGTA  
CAAGGTGGCGCAAAAAATTCAAAGTTCTGGGCAATACCGATCGCCACAGCATAAAGAAGAACCTCATTGGCGCCCTCC  
TGTTGCATCCGGGGAGCCGCGGAGCCAGCGGCTCAAAGAACAGCAGCGGCGAGATATACCCGCAAGAAAGTACGG  
ATCTGCTACCTGCAGGAGATCTTAGTAATGAGATGGCTAAGGTGGATGACTCTTTCTCCATAGGCTGGAGGAGTCCCT  
TTGGTGGAGGAGGATAAAAAGCACGAGCGCCACCCAATCTTTGGCAATATCGTGGAGCGAGGTGGCGTACCATGAAAAGT  
ACCAACCATATATCATCTGAGGAAGAAGCTTGTAGACAGTACTGATAAGGCTGACTTGGCGTTGATCTATCTCGCGCTG  
GGCATATGATCAAATTCGGGGACACTTCTCATCGAGGGGACCTGAACCCAGACAACAGCGATGTCGCAAAACTCTT  
TATCCAACCTGGTTCAGACTTACAATCAGCTTTTCGAAGAGAACCCTGATCAACGCATCCGGAGTTGACGCCAAAGCAATCC  
TGAGCGCTAGGCTGTCCAAATCCGGGGGCTCGAAAACCTCATCGCACAGCTCCCTGGGAGAGAAGAAGCGGCTGTTT  
GGTAATCTTATCGCCCTGTACTCGGGCTGACCCCACTTTAAATCTAACTTCGACCTGGCCGAAGATGCCAAGCTTCA  
ACTGAGCAAAGACACCTACGATGATGATCTCGACAATCTGCTGGCCAGATCGGCGACCAGTACCGACACCTTTTTTTGG  
CGCAAGAACCTGTACAGACGCCATTTCTGCTAGGTACTTCTGCGAGTGAACACGGAGATACCAAGCTCCGCTGAGC  
GCTAGTATGATCAAGCGTATGATGAGCACCACCAAGACTTGACTTTGCTGAAGGCCCTTGTACAGCAGCACTGCCTGA  
GAAGTACAGGAATTTTCTTCGATCAGTCTAAAATGGCTACGCCGATACATTGACGGCGGAGCAAGCCAGGAGGAAT  
TTTACAAATTTATTAAGCCATCTTGGAAAAATGGACGGCACCAGGAGCTGCTGGTAAAGCTTAACAGAGAAGATCTG  
TTGCGCAAAACAGCGCACTTTTCGACAAATGGAAAGCATCCCCACCAGATTCACCTGGGGCAACTGCACGCTATCCGCT  
GCAAGAGGATTTTCTACCCCTTTTGAAGATAACAGGAAAAAGATTGAGAAAACTCTCACATTCGGATACCTACTATG  
TAGGCCCTCGCCGGGAAATTCAGATTCGCGTGGATGACTCGCAATCAGAAGAGACCATCACTCCCTGGAACTTC  
GAGGAAGTCGTGATAAGGGGGCTCTGCCAGTCTTATCGAAAGGATGACTAACTTTGATAAAAACTCGCTAACGA  
AAAGGTGCTTCTTAAACACTCTCTGACGACTTCTCAGTGTATCTACAGTTTATAACGAGCTACCAAGTCAAATCCGCTACAG  
AAGGGATGAGAAAGCCAGCATCTCTGTCTGGAGAGCAGAAGAAAGCTATCGTGGACCTCTCTTCAAGACGAACCGGAAA  
GTTACCGTGAAACAGCTCAAAGAAGACTATTTCAAAGAGATTGAATGTTTCCGACTCTGTGAAATCAGCGGAGTGGAGGA  
TCGCTTCAACGCATCCCTGGGAACGTATCAGATCTCTGAAATCAITAAAGACAAGGACTTCTGGCAATGAGGAGA  
ACGAGTATCCGATCAGCATCGCTAATCTTCCAGCTTCTCAGCTTATCGAGTTTGAAGATAGGGAGATGATTGAAGACGCT  
TACGCTCATCTCTTCGACGACAAAGTCAATAACAGCTCAAGAGGCGCCGATATACAGGATGGGGCGGCTGTCAAGAAA  
ACTGATCAATGGGATCCGAGACAAAGCAGAGTGGAAAGACAATCTGGATTTTCTTAAGTCCGATGGATTTGCCAACC  
ACTTCATGCAGTTGATCCATGATGACTCTCTACCTTAAAGGAGGACATCCAGAAAGCACAAGTTTCTGGCCAGGGGAC  
AGTCTTCAACGATCAGCATCGCTAATCTTGCAGGTAGCCAGCTATCAAAGAGGAATACTGCAGACCGTAAAGTCTGTGA  
TGAACCTCGTCAAAGTAATGGGAAGGCATAAGCCCGAGAATATCGTTATCGAGATGGCCCGAGAGAACCAACTACCCAGA  
AGGGACAGAAGAACAGTGGGAAGGATGAAGAGGATGAAGAGGGTATAAAAGAATCGGGTCCCAATCTTAAGGAA  
CACCCAGTTGAAAACACCCAGCTTCAAGATGAGAAGCTTACCTGTACTACCTGCAGAACGGCAGGGACATGTACGTGGA  
TCAGGAACCTGGACATCAATCGGCTCTCCGACTACGACGTGGATCATATCGTGGCCAGCTCTTTCTCAAAGATGATTCTA  
TTGATAATAAAGTGTGACAAGATCCGATAAAAAATAGAGGGAAGAGTGATAACGTCCTCAGAAAGTGTGCAAGAAA  
ATGAAAAATATTTGGCGCAGCTGCTGAACGCCAAACTGATCACACAACGGAAGTTCGATAAATCTGACTAAGCTGAACG  
AGGTGGCCTGTCTGAGTTGGATAAAGCCGGCTTCACTCAAAGGCAGCTTGTGAGACACGCCAGATCACCAAGCAGCTGG  
CCAAATTTCTCGATCAGCATGAACCAATGACATGACAAATGACAAACTGATTTCGAGAGGTGAAAGTATCTCTG  
AAGTCTAAGCTGGTCTCAGATTTTCAAGAAAGACTTTTCAAGTTTATAAGGTGAGAGAGATCAACAATACCACCATGCGCA  
TGATGCCACTTGAATGCAGTGGTAGGCACTGCATTTATCAAAAAATATCCCAAGCTGAATCTGAATTTGTTTACGGAG  
ACTATAAAGTGTACGATGTTAGGAAAATGATCGCAAAGTCTGAGCAGGAAAATAGGCAAGGCCACCGCTAAGTACTTCTTT  
TACAGCAATATTTGAAATTTTTTCAAGCCAGATTTACACTGGCCAAATGGAGAGATTCGGAAGCCAGCCACTTCAAAAC  
AAACGGAGAAACAGGAGAAATCGTGTGGGACAAGGGTAGGGATTTCCGACAGTCCGGAAAGTCTGTCCATGCCGAGG  
TGAACATCGTTAAAAGACCGAAGTACAGACCGGAGGCTTCTCAAGGAAAGTATCCCTCCGAAAAGGAACAGCGACAAAG  
CTGATCGCACGCAAAAAGATTGGGACCCCAAGAAATACGGCGGATTCGATTTCTCTACAGTTCGCTTACAGTGTACTGGT  
TGTGGCCAAAGTGGAGAAAGGAAAGTCAAAGAACTCAAAGGCTCAAGGAACCTGGGCAACCAATCATGAGCGGAT  
CAAGCTTCGAAAAAACCCCATCGACTTCTCGAGGCGAAAGGATATAAAGAGGTCAAAGAAAGACCTCATCATTAAGCTT  
CCCAAGTACTCTCTTTGAGCTTGAAAACGGCCGAAACGAATGCTCGCTAGTGCAGGCGAGCTGCAGAAAGGTAACGA  
GCTGGCACTGCCCTCTAAATACGTTAATTTCTGTATCTGGCCAGCCACTATGAAAAGCTCAAAGGGTCTCCCGAAGATA  
ATGAGCAGAAGCAGCTGTTCTGGAACAACAACAACACTACTTGTATGAGATCATCGAGCAAATAAGCGAATTTCTCCAAA  
AGAGTATCCTCGCCGAGCTAACCTCGATAAAGTGTCTTCTGCTTACAATAAGCACAGGGATAAGCCCATCAGGGAGCA  
GGCAGAAAACATTATCCACTTGTTTACTCTGACCAACTTGGGCGCGCTGCAGCTTCAAGTACTTCGACACCACCATAG  
ACAGAAAACGGTACACCTTACAAAGGAGGCTCTGGACGCCACACTGATTCATCAGTCAATACGGGGCTCTATGAAACA  
AGAATCGACCTCTCAGCTCGGTGGAGACAGCAGGCTCACCCCAAGAGAAGAGGTTGGCTAGCGAGGGCAGAGG  
**AAGTCTTCAACATGCGGTGACGTGGAGGAGAATCCCGCCCTGgtacGgtgagcaagggcgaggagctgttaccgggg**  
**tggtgccatcctggtogagctggacggcgaagtaaacggccacaagttcagcgtgtccggcgagggcgaggcgatgcc**  
**acctacggcaagctgacctgaagttcatctgaccaccggcaagctgcccgtgcccggccaccctcgtgaccacct**  
**gacctacggcgtgacgtgcttcagccgctaccccaccacatgaagcagcagcacttcttcaagtccgcatgcccgaag**  
**gctacgtccaggagcgaccatcttctcaaggacgacggcaactacaagaccggcggcggaggtgaagttcgagggcgac**  
**acctggtgaaccgcatcgagctgaaggcctcagcttcaaggaggacggcaacatcctggggcacaagctggagtaaca**  
**ctacaacagccacaacctctatatcatggcgcagaagcagaagacggcatcaaggtgaactcaagatccggcacaaca**  
**tcgaggacggcagcgtgacgtcgccgaccactaccagcagaacacccccatcggcgacggccccgtgctgctgcccgac**  
**aacctacctgacaccagtcggcctgagcaaaagcccaacgagaagcgcatcacatggtcctgctggaggtcgt**  
**gaccgcccgggatcactctcgccatggacgagctgtacaagAccggTTAG**

**Supplementary Figure 12. hCas9-T2A-GFP DNA sequence. SpCas9 human optimized sequence, HA tag, T2A peptide, eGFP sequence.**

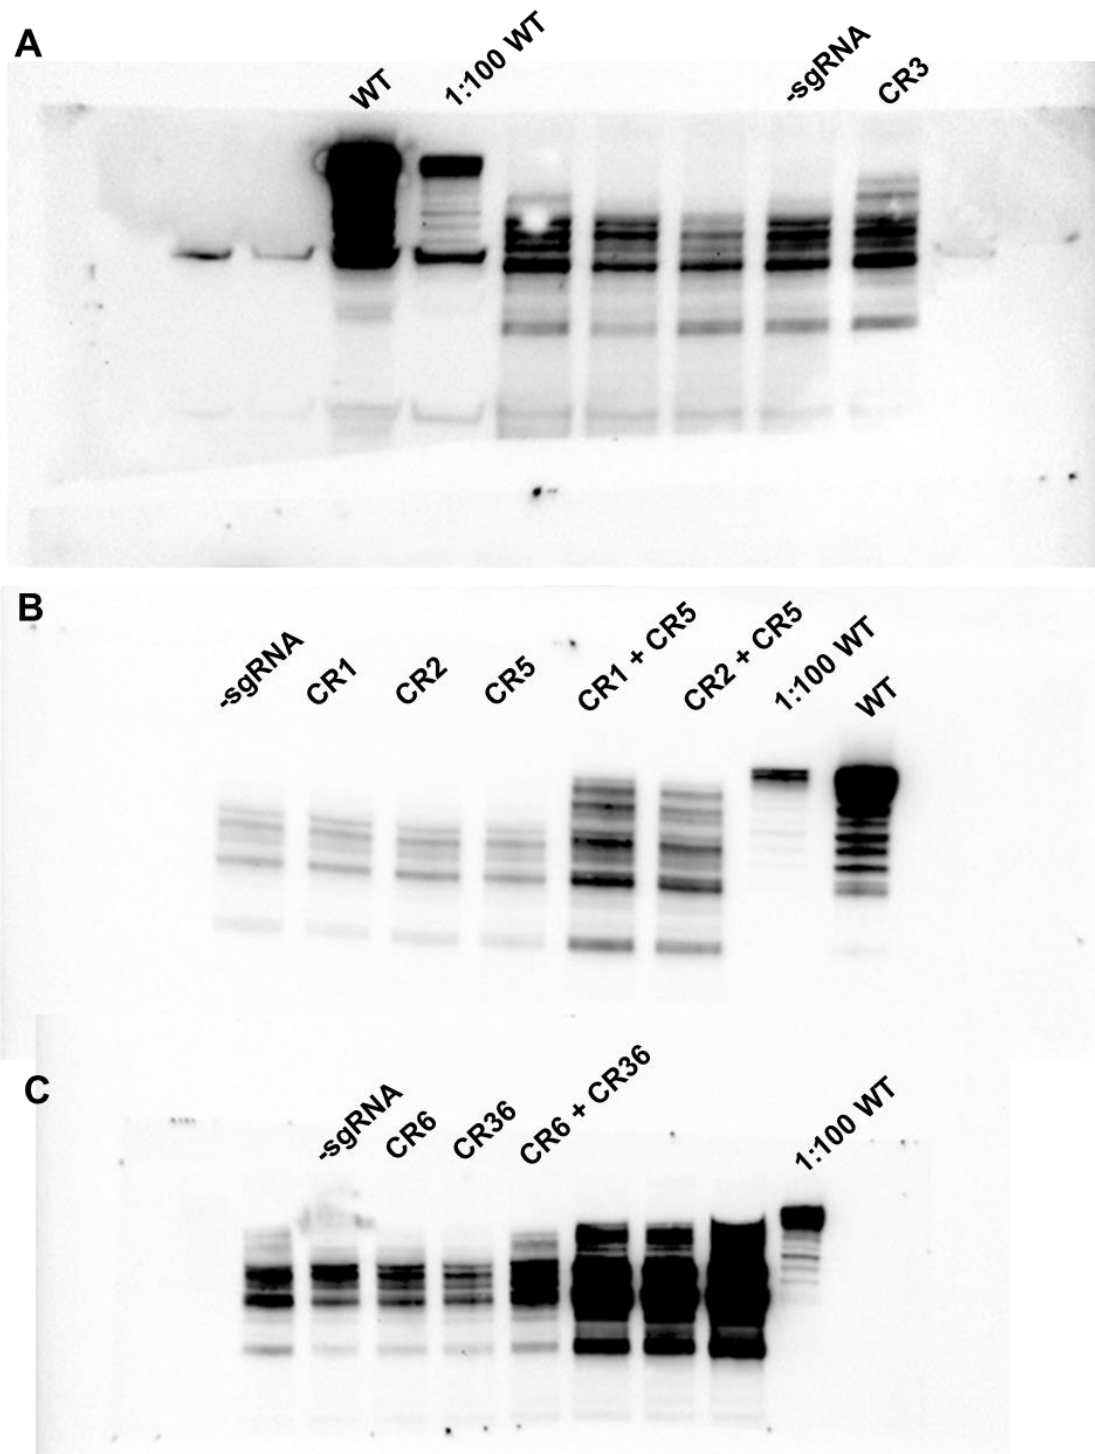

**Supplementary Figure 13.** Uncropped dystrophin western blots for A) Figure 3D, B) Figure 4D, and C) Figure 5D.

**Supplementary Table 1:** List of sgRNA targets in this study. PAM: protospacer-adjacent motif.

| Name | Target     | Strand | 19bp protospacer      | PAM | Target Finder                            |
|------|------------|--------|-----------------------|-----|------------------------------------------|
| CR1  | Intron 50  | +      | GATTGGCTTTGATTTCCCTA  | GGG | Manual Inspection                        |
| CR2  | Intron 50  | -      | GTGTAGAGTAAGTCAGCCTA  | TGG | Manual Inspection                        |
| CR3  | Exon 51-5' | +      | GCCTACTCAGACTGTTACTC  | TGG | Manual Inspection                        |
| CR4  | Exon 51-3' | +      | GTTGGACAGAACTTACCGAC  | TGG | Manual Inspection                        |
| CR5  | Intron 51  | -      | GCAGTTGCCTAAGAACTGGT  | GGG | Manual Inspection                        |
| CR6  | Intron 44  | -      | GGGGCTCCACCCTCACGAGT  | GGG | UCSC Browser (Cong et al. Science 2013)  |
| CR7  | Intron 55  | +      | GTTTGCTTCGCTATAAAACG  | AGG | UCSC Browser (Cong et al. Science 2013)  |
| CR10 | Exon 45    | +      | GCCAGGATGGCATTGGGCAG  | CGG | Manual Inspection                        |
| CR11 | Exon 45    | +      | GCTGAATCTGCGGTGGCAGG  | AGG | Manual Inspection                        |
| CR12 | Exon 46    | -      | GTTCTTTTGTTCTTCTAGCC  | TGG | Manual Inspection                        |
| CR13 | Exon 46    | +      | GGAAAAGCTTGAGCAAGTCA  | AGG | Manual Inspection                        |
| CR14 | Exon 47    | +      | GGAAGAGTTGCCCTGCGCC   | AGG | Excel File from Mali et al. Science 2013 |
| CR15 | Exon 47    | +      | GACAAATCTCCAGTGGATAA  | AGG | Manual Inspection                        |
| CR16 | Exon 48    | -      | GTGTTTCTCAGGTAAAGCTC  | TGG | Manual Inspection                        |
| CR17 | Exon 48    | +      | GGAAGGACCATTTGACGTTA  | AGG | Manual Inspection                        |
| CR18 | Exon 49    | -      | GAAGTCTATTTTCTGTTTCC  | TGG | Manual Inspection                        |
| CR19 | Exon 49    | +      | GCCAGCCACTCAGCCAGTGA  | AGG | Manual Inspection                        |
| CR20 | Exon 50    | +      | GGTATGCTTTTCTGTTAAAG  | AGG | Manual Inspection                        |
| CR21 | Exon 50    | +      | GCTCCTGGACTGACCACTAT  | TGG | Manual Inspection                        |
| CR22 | Exon 52    | +      | GGAACAGAGGCGTCCCCAGT  | TGG | Manual Inspection                        |
| CR23 | Exon 52    | +      | GGAGGCTAGAACAAATCATT  | CGG | Manual Inspection                        |
| CR24 | Exon 53    | +      | GACAAGAACACCTTCAGAAC  | CGG | Manual Inspection                        |
| CR25 | Exon 53    | -      | GGGTTTCTGTGATTTTCTTT  | TGG | Manual Inspection                        |
| CR26 | Exon 54    | +      | GGGCCAAAGACCTCCGCCAG  | TGG | Manual Inspection                        |
| CR27 | Exon 54    | +      | GTTGGAGAAGCATTTCATAAA | AGG | Manual Inspection                        |
| CR28 | Exon 55    | -      | GTCGCTCACTCACCTGCAA   | AGG | Manual Inspection                        |
| CR29 | Exon 55    | +      | GAAAAGAGCTGATGAAACAA  | TGG | Manual Inspection                        |
| CR31 | Exon 51    | +      | GGAGATGATCATCAAGCAGA  | AGG | Manual Inspection                        |
| CR33 | Intron 44  | -      | GCACAAAAGTCAAATCGGAA  | TGG | UCSC Browser (Cong et al. Science 2013)  |
| CR34 | Intron 44  | -      | GATTTCAATATAAGATTCGG  | AGG | UCSC Browser (Cong et al. Science 2013)  |
| CR35 | Intron 55  | -      | GCTTAAGCAATCCCGAACTC  | TGG | UCSC Browser (Cong et al. Science 2013)  |
| CR36 | Intron 55  | -      | GCCTTCTTTATCCCCTATCG  | AGG | UCSC Browser (Cong et al. Science 2013)  |

**Supplementary Table 2** - Summary of top 10 off target sites predicted *in silico* and activity at each site as detected by the Surveyor assay in HEK293T cells transfected with Cas9 and the indicated sgRNA expression cassettes. n.d.: not detected.

| Guide | Target               | Sequence              | PAM | Score | Chr    | Gene     | Intron/Exon | # MMs | % indels |
|-------|----------------------|-----------------------|-----|-------|--------|----------|-------------|-------|----------|
| CR3   | Guide                | GCCTACTCAGACTGTTACTC  | -   | -     | -      | -        | -           | -     | -        |
|       | Target               | tCCTACTCAGACTGTTACTC  | TGG | -     | X      | DMD      | Exon        | 1     | 13.0     |
|       | OT1                  | tCCTACTCAcACTGTTACTC  | AGG | 7.4   | 1      | STRIP1   | Intron      | 2     | 9.3      |
|       | OT2                  | aCCTgCTCAcACTGTTACTC  | CAG | 2.5   | 2      | ARHGAP25 | Intron      | 3     | n.d.     |
|       | OT3                  | GCaTtCTCAaACTGTTACTC  | AGG | 2.4   | 13     | None     | None        | 3     | n.d.     |
|       | OT4                  | GgaTtCTCAcACTGTTACTC  | GGG | 1.3   | 14     | PGPEP1   | Exon        | 4     | n.d.     |
|       | OT5                  | aCaTACTtAtACTGTTACTC  | TAG | 1.3   | 19     | MDGA2    | Intron      | 4     | n.d.     |
|       | OT6                  | tatTcCTaAGACTGTTACTC  | AAG | 0.9   | 8      | LPPR1    | Intron      | 5     | n.d.     |
|       | OT7                  | aaggACTaAGACTGTTACTC  | GGG | 0.9   | 9      | RNF122   | Intron      | 5     | n.d.     |
|       | OT8                  | GagctCTCAcACTGTTACTC  | TAG | 0.8   | 3      | DNMBP    | Exon        | 5     | n.d.     |
|       | OT9                  | GCaaAaTgAGACTGTTACTC  | CAG | 0.8   | 5      | SLC12A2  | Intron      | 4     | n.d.     |
| OT10  | cCtcAtTCAGACTGTTACTC | AAG                   | 0.8 | 4     | KCNIP4 | Intron   | 4           | n.d.  |          |
| CR1   | Guide                | GATTGGCTTTGATTCCCTA   | -   | -     | -      | -        | -           | -     | -        |
|       | Target               | cATTGGCTTTGATTCCCTA   | GGG | -     | X      | DMD      | Intron      | 1     | 8.3      |
|       | OT1                  | aATTGGCATTGATTCCCTA   | GAG | 7.1   | 16     | None     | None        | 2     | 0.8      |
|       | OT2                  | cATTGGCTTTaATTCCCTA   | TAG | 4.8   | 4      | None     | None        | 2     | n.d.     |
|       | OT3                  | GATaGGCTgTGATTCCCTA   | GAG | 3.9   | 9      | None     | None        | 2     | n.d.     |
|       | OT4                  | GAaTaGCcTTGATTCCCTA   | AAG | 2.4   | 1      | None     | None        | 3     | n.d.     |
|       | OT5                  | aATTtGCTTTGATTCCCTg   | AGG | 1.5   | 1      | TIMM17A  | Intron      | 3     | n.d.     |
|       | OT6                  | GATgtGCTTTGATTCCCTt   | GGG | 1.4   | 17     | MYO1D    | Intron      | 3     | n.d.     |
|       | OT7                  | aATTGGtTTTaATTCCCTA   | AAG | 1.1   | 8      | PIK1A    | Intron      | 3     | n.d.     |
|       | OT8                  | aATTGGgTTTGATTCCCTt   | TGG | 1.1   | 11     | MS4A1    | Intron      | 3     | n.d.     |
|       | OT9                  | GATgGGtTTTtATTCCCTA   | GAG | 1.0   | 11     | None     | None        | 3     | n.d.     |
| OT10  | GAaTGGtTTTGATTCCCTg  | GAG                   | 1.0 | 11    | None   | None     | 3           | n.d.  |          |
| CR5   | Guide                | GCAGTTGCCTAAGAAGCTGGT | -   | -     | -      | -        | -           | -     | -        |
|       | Target               | aCAGTTGCCTAAGAAGCTGGT | GGG | -     | X      | DMD      | Intron      | 1     | 14.0     |
|       | OT1                  | cCAGTTGtCTAAGAAGCTGGg | GAG | 1.5   | 5      | NRG1     | Intron      | 3     | n.d.     |
|       | OT2                  | GCAGTTGCCTgtGAAGCTGGT | AGG | 1.4   | X      | None     | None        | 2     | n.d.     |
|       | OT3                  | GCAGaTGCagAAGAAGCTGGT | GAG | 1.4   | 19     | SMIM7    | Intron      | 3     | n.d.     |
|       | OT4                  | GCAGTTcCagAAGAAGCTGGT | GAG | 0.9   | 11     | GLB1L2   | Intron      | 3     | n.d.     |
|       | OT5                  | caAcTTGCCTaTGAAGCTGGT | AGG | 0.7   | 8      | ASAP1    | Intron      | 4     | n.d.     |
|       | OT6                  | aCAccTGCCTAAGAAGCTGGa | GGG | 0.7   | 11     | None     | None        | 4     | n.d.     |
|       | OT7                  | tCAGgTGgCTAAGAAGCTGGg | TGG | 0.7   | 14     | NIN      | Intron      | 4     | n.d.     |
|       | OT8                  | GaAGTTGgCcAAGAAGCTGGa | GAG | 0.6   | 7      | None     | None        | 4     | n.d.     |
|       | OT9                  | GCTGcTGCCcAAGAAGCTGGc | AGG | 0.6   | 11     | AMOTL1   | Intron      | 4     | n.d.     |
| OT10  | tCAGcTGgCTAAGAAGcGGT | AAG                   | 0.6 | 7     | ACTR3C | Intron   | 4           | n.d.  |          |
| CR6   | Guide                | GGGGCTCCACCCTCACGAGT  | -   | -     | -      | -        | -           | -     | -        |

|      |        |                      |     |     |    |              |        |   |      |
|------|--------|----------------------|-----|-----|----|--------------|--------|---|------|
|      | Target | aGGGCTCCACCCTCACGAGT | GGG | -   | X  | DMD          | Intron | 1 | 19.9 |
|      | OT1    | GcaGCTCagCCCTCACGAGT | CAG | 0.8 | 3  | None         | None   | 4 | n.d. |
|      | OT2    | GGGGCTcCaCaTCACGAGT  | GAG | 0.8 | 8  | None         | None   | 3 | n.d. |
|      | OT3    | GGGGCTcCccCTCACtAGT  | GAG | 0.6 | 8  | None         | None   | 3 | n.d. |
|      | OT4    | GGGGaTCCACCtTCACcAGT | CAG | 0.6 | 2  | None         | None   | 3 | n.d. |
|      | OT5    | aGGGCTggACCCTCACaAGT | AAG | 0.4 | 16 | AXIN1        | Intron | 4 | n.d. |
|      | OT6    | tGGtCTCCtCCCcCACGAGT | GGG | 0.4 | 2  | None         | None   | 4 | n.d. |
|      | OT7    | aGGGCTCCcaCCcCACGAGT | GAG | 0.3 | 5  | None         | None   | 4 | n.d. |
|      | OT8    | GaGGCTCCAtaCTCACcAGT | GAG | 0.3 | 11 | None         | None   | 4 | n.d. |
|      | OT9    | GGaGCTgCcCCtTCACGAGT | GGG | 0.3 | 3  | None         | None   | 4 | n.d. |
|      | OT10   | atGaTCCACCCTCAaGAGT  | AAG | 0.3 | 8  | AGPAT5       | None   | 4 | n.d. |
| CR36 | Guide  | GCCTTCTTTATCCCCTATCG | -   | -   | -  | -            | -      | - | -    |
|      | Target | GCCTTCTTTATCCCCTATCG | AGG | -   | X  | DMD          | Intron | 0 | 20.6 |
|      | OT1    | GtCTgCTgTgTCCCCTATCG | GGG | 1.3 | 21 | None         | None   | 4 | n.d. |
|      | OT2    | cCCTTCTcTATCCCCTgTCG | TGG | 1.3 | 8  | None         | None   | 3 | n.d. |
|      | OT3    | GCCTTCTTTATCCCCTcTCt | TGG | 0.9 | 10 | None         | None   | 2 | 0.5  |
|      | OT4    | GCgcTCTTtTCCCCTATCt  | TAG | 0.6 | 16 | None         | None   | 4 | n.d. |
|      | OT5    | GCCcTCTgTcTCCCCTgTCG | CAG | 0.5 | 1  | NFASC        | None   | 4 | n.d. |
|      | OT6    | tCCATCTtTgTCCCCTATg  | AGG | 0.5 | 10 | None         | None   | 4 | n.d. |
|      | OT7    | aCCtTCTCTcTCCCCTATaG | AGG | 0.5 | 5  | LOC100996485 | Intron | 4 | n.d. |
|      | OT8    | GtTTCTTTtTCCCCTATgG  | GAG | 0.5 | 3  | None         | None   | 4 | n.d. |
|      | OT9    | tgCTTCTTaATCCCCTATCa | AAG | 0.4 | 7  | None         | None   | 4 | n.d. |
|      | OT10   | aCCTTCTTacTCCCCTATCc | GGG | 0.4 | 10 | ADARB2       | None   | 4 | n.d. |



**Supplementary Table 3** – Summary of deep sequencing data in HEK293T cells. Two target sites (CR6-OT5 and CR36-OT2) did not meet filtering criteria.

| Name     | Control    |                 |               |                |               | Treated    |                 |               |                |               |
|----------|------------|-----------------|---------------|----------------|---------------|------------|-----------------|---------------|----------------|---------------|
|          | Indel Rate | Total Fragments | Deletion Rate | Insertion Rate | Mismatch Rate | Indel Rate | Total Fragments | Deletion Rate | Insertion Rate | Mismatch Rate |
| CR1-ON   | 0.00052    | 243027          | 0.0004        | 0.00017        | 0.02429       | 0.43347    | 267751          | 0.34572       | 0.0916         | 0.05227       |
| CR1-OT1  | 0.00027    | 411808          | 0.00017       | 0.00011        | 0.02328       | 0.02714    | 401695          | 0.02396       | 0.00348        | 0.02598       |
| CR1-OT2  | 0.00022    | 365026          | 0.0002        | 2.00E-05       | 0.01897       | 0.00203    | 425954          | 0.00064       | 0.00139        | 0.02196       |
| CR1-OT3  | 0.00016    | 328638          | 0.00016       | 0              | 0.01923       | 0.0002     | 388723          | 0.00014       | 6.00E-05       | 0.02115       |
| CR1-OT4  | 0.00055    | 361026          | 0.00052       | 4.00E-05       | 0.02049       | 0.00051    | 417425          | 0.00044       | 0.0001         | 0.02199       |
| CR1-OT5  | 0.00028    | 359377          | 0.00022       | 8.00E-05       | 0.02212       | 0.00175    | 398647          | 0.00101       | 0.00076        | 0.02205       |
| CR1-OT6  | 0.00044    | 321939          | 0.00037       | 9.00E-05       | 0.02441       | 0.00057    | 339778          | 0.00053       | 4.00E-05       | 0.02369       |
| CR1-OT7  | 0.00051    | 379105          | 0.00043       | 0.00012        | 0.01914       | 0.00117    | 416034          | 0.0011        | 8.00E-05       | 0.02145       |
| CR1-OT8  | 0.00046    | 335770          | 0.00037       | 9.00E-05       | 0.02824       | 0.00068    | 385279          | 0.00061       | 8.00E-05       | 0.02874       |
| CR1-OT9  | 0.00092    | 357883          | 0.00091       | 2.00E-05       | 0.02335       | 0.00089    | 363909          | 0.00084       | 0.0001         | 0.0247        |
| CR1-OT10 | 0.00049    | 284512          | 0.00045       | 5.00E-05       | 0.02047       | 0.0003     | 342036          | 0.00022       | 0.0001         | 0.02172       |
| CR3-ON   | 0.00053    | 302973          | 0.0005        | 5.00E-05       | 0.02588       | 0.47124    | 253192          | 0.42175       | 0.0555         | 0.05982       |
| CR3-OT1  | 0.00013    | 719339          | 0.00013       | 1.00E-05       | 0.01903       | 0.14208    | 370557          | 0.08705       | 0.05862        | 0.0343        |
| CR3-OT2  | 0.00015    | 182795          | 0.00015       | 3.00E-05       | 0.02919       | 0.00018    | 287311          | 0.00018       | 0              | 0.02967       |
| CR3-OT3  | 0.00031    | 328157          | 0.00031       | 4.00E-05       | 0.01887       | 0.00026    | 409230          | 0.00025       | 1.00E-05       | 0.02052       |
| CR3-OT4  | 0.00016    | 391369          | 0.00016       | 2.00E-05       | 0.01897       | 0.00013    | 420277          | 0.00013       | 3.00E-05       | 0.02103       |
| CR3-OT5  | 0.00027    | 372827          | 0.00027       | 2.00E-05       | 0.02111       | 0.00012    | 430488          | 0.00012       | 3.00E-05       | 0.02245       |
| CR3-OT6  | 0.00021    | 342654          | 0.00021       | 0              | 0.02423       | 0.00038    | 368779          | 0.00038       | 0              | 0.02421       |
| CR3-OT7  | 0.0003     | 359973          | 0.0003        | 0              | 0.02161       | 0.00032    | 380575          | 0.00031       | 1.00E-05       | 0.02209       |
| CR3-OT8  | 0.00019    | 397337          | 0.00017       | 2.00E-05       | 0.01781       | 0.00011    | 437460          | 0.00011       | 0              | 0.0202        |
| CR3-OT9  | 0.0002     | 388197          | 0.0002        | 3.00E-05       | 0.0245        | 0.00014    | 458468          | 0.00014       | 2.00E-05       | 0.02507       |
| CR3-OT10 | 0.00019    | 365463          | 0.00019       | 1.00E-05       | 0.02372       | 0.0001     | 406307          | 0.0001        | 3.00E-05       | 0.02507       |
| CR5-ON   | 0.00099    | 309859          | 0.00086       | 0.00017        | 0.02189       | 0.49817    | 285901          | 0.2862        | 0.22299        | 0.04453       |
| CR5-OT1  | 0.00045    | 291709          | 0.00045       | 1.00E-05       | 0.0222        | 0.00056    | 377889          | 0.00056       | 1.00E-05       | 0.0228        |
| CR5-OT2  | 0.0001     | 369417          | 0.0001        | 0              | 0.01799       | 7.00E-05   | 431321          | 7.00E-05      | 1.00E-05       | 0.01954       |
| CR5-OT3  | 4.00E-05   | 392030          | 4.00E-05      | 0              | 0.02709       | 7.00E-05   | 467339          | 7.00E-05      | 0              | 0.02871       |
| CR5-OT4  | 0.00018    | 346914          | 0.00018       | 1.00E-05       | 0.02334       | 0.00016    | 432302          | 0.00016       | 1.00E-05       | 0.02427       |
| CR5-OT5  | 0.00014    | 295921          | 0.00014       | 0              | 0.02763       | 0.0001     | 446745          | 0.0001        | 3.00E-05       | 0.02819       |
| CR5-OT6  | 0.00021    | 352160          | 0.00021       | 1.00E-05       | 0.01255       | 0.00064    | 397458          | 0.00028       | 0.00036        | 0.01498       |
| CR5-OT7  | 0.00019    | 329004          | 0.00019       | 2.00E-05       | 0.02071       | 0.00019    | 412376          | 0.00019       | 1.00E-05       | 0.02102       |
| CR5-OT8  | 0.00091    | 322079          | 0.00089       | 3.00E-05       | 0.02439       | 0.00127    | 393387          | 0.00121       | 7.00E-05       | 0.02697       |
| CR5-OT9  | 0.00017    | 374068          | 0.00017       | 0              | 0.01671       | 0.00018    | 432857          | 0.00018       | 1.00E-05       | 0.01824       |
| CR5-OT10 | 0.00021    | 179114          | 0.00021       | 0              | 0.01859       | 0.00023    | 201890          | 0.00023       | 2.00E-05       | 0.02048       |
| CR6-ON   | 0.0003     | 290616          | 0.0003        | 3.00E-05       | 0.03263       | 0.41742    | 185015          | 0.34285       | 0.10845        | 0.11217       |
| CR6-OT1  | 7.00E-05   | 428755          | 7.00E-05      | 0              | 0.02394       | 9.00E-05   | 457045          | 9.00E-05      | 0              | 0.02423       |

|                  |          |        |          |          |         |          |        |          |          |         |
|------------------|----------|--------|----------|----------|---------|----------|--------|----------|----------|---------|
| <b>CR6-OT2</b>   | 0.00016  | 409001 | 0.00016  | 0.0001   | 0.99879 | 0.00022  | 447076 | 0.00022  | 0.00013  | 0.99861 |
| <b>CR6-OT3</b>   | 0.00023  | 434076 | 0.00021  | 5.00E-05 | 0.02102 | 0.00024  | 465851 | 0.00024  | 4.00E-05 | 0.02116 |
| <b>CR6-OT4</b>   | 0.0002   | 299885 | 0.00019  | 5.00E-05 | 0.03155 | 0.00014  | 461310 | 0.00013  | 4.00E-05 | 0.03442 |
| <b>CR6-OT5</b>   | 0        | 0      | 0        | 0        | 0       | 0        | 0      | 0        | 0        | 0       |
| <b>CR6-OT6</b>   | 0.00128  | 371603 | 0.00122  | 9.00E-05 | 0.02076 | 0.00141  | 435021 | 0.00133  | 9.00E-05 | 0.02051 |
| <b>CR6-OT7</b>   | 0.00097  | 357297 | 0.00094  | 5.00E-05 | 0.02202 | 0.00116  | 389245 | 0.00116  | 0        | 0.02097 |
| <b>CR6-OT8</b>   | 5.00E-05 | 391996 | 5.00E-05 | 3.00E-05 | 0.03137 | 8.00E-05 | 402702 | 7.00E-05 | 1.00E-05 | 0.03271 |
| <b>CR6-OT9</b>   | 0.00034  | 278774 | 0.0003   | 6.00E-05 | 0.02209 | 0.00042  | 351486 | 0.00041  | 2.00E-05 | 0.02168 |
| <b>CR6-OT10</b>  | 0.00019  | 371608 | 0.00019  | 4.00E-05 | 0.02196 | 0.00013  | 390906 | 0.00013  | 0        | 0.02059 |
| <b>CR36-ON</b>   | 0.00038  | 315822 | 0.00032  | 7.00E-05 | 0.02423 | 0.46651  | 235772 | 0.33855  | 0.13833  | 0.05232 |
| <b>CR36-OT1</b>  | 0.00042  | 223999 | 0.0004   | 2.00E-05 | 0.01796 | 0.00047  | 145707 | 0.00047  | 0.00011  | 0.02122 |
| <b>CR36-OT2</b>  | 0        | 628    | 0        | 0        | 0.01274 | 0.07077  | 1526   | 0        | 0.07077  | 0.05636 |
| <b>CR36-OT3</b>  | 0.00039  | 417392 | 0.00039  | 5.00E-05 | 0.02281 | 0.01179  | 480401 | 0.01035  | 0.00145  | 0.02337 |
| <b>CR36-OT4</b>  | 0.0016   | 348794 | 0.00146  | 0.00015  | 0.02001 | 0.00174  | 501588 | 0.00154  | 0.00021  | 0.02138 |
| <b>CR36-OT5</b>  | 0.00123  | 372201 | 0.00113  | 0.00012  | 0.02009 | 0.00138  | 475009 | 0.00132  | 7.00E-05 | 0.02013 |
| <b>CR36-OT6</b>  | 0.00052  | 358534 | 0.00051  | 2.00E-05 | 0.01993 | 0.00062  | 425704 | 0.00058  | 4.00E-05 | 0.02172 |
| <b>CR36-OT7</b>  | 0.00023  | 311339 | 0.00022  | 5.00E-05 | 0.02392 | 0.0002   | 316903 | 0.00016  | 5.00E-05 | 0.02522 |
| <b>CR36-OT8</b>  | 0.00323  | 396424 | 0.00294  | 0.00031  | 0.0247  | 0.00215  | 452046 | 0.00196  | 0.0002   | 0.02584 |
| <b>CR36-OT9</b>  | 0.00018  | 360872 | 0.00018  | 0        | 0.02212 | 0.00014  | 414386 | 0.00014  | 1.00E-05 | 0.02495 |
| <b>CR36-OT10</b> | 0.00031  | 425413 | 0.0003   | 3.00E-05 | 0.02028 | 0.0021   | 453005 | 0.00149  | 0.00063  | 0.02174 |

**Supplementary Table 4** – Summary of deep sequencing data in DMD myoblasts.

| Control         |            |                 |               |                |               | Treated    |                 |               |                |               |
|-----------------|------------|-----------------|---------------|----------------|---------------|------------|-----------------|---------------|----------------|---------------|
| Name            | Indel Rate | Total Fragments | Deletion Rate | Insertion Rate | Mismatch Rate | Indel Rate | Total Fragments | Deletion Rate | Insertion Rate | Mismatch Rate |
| <b>CR1-ON</b>   | 0.00043    | 383850          | 0.00034       | 0.00013        | 0.0246        | 0.11259    | 404882          | 0.09449       | 0.01815        | 0.02831       |
| <b>CR1-OT1</b>  | 0.00048    | 447057          | 0.00039       | 0.0001         | 0.02582       | 0.00144    | 269616          | 0.00141       | 6.00E-05       | 0.02438       |
| <b>CR36-ON</b>  | 0.00034    | 472513          | 0.00033       | 2.00E-05       | 0.02265       | 0.03234    | 405322          | 0.01281       | 0.01955        | 0.01671       |
| <b>CR36-OT3</b> | 0.00044    | 490131          | 0.00044       | 3.00E-05       | 0.02356       | 0.00038    | 444132          | 0.00035       | 5.00E-05       | 0.0218        |
| <b>CR3-ON</b>   | 0.00051    | 303508          | 0.0005        | 3.00E-05       | 0.02662       | 0.06907    | 430026          | 0.05357       | 0.01637        | 0.02598       |
| <b>CR3-OT1</b>  | 0.00012    | 451889          | 0.00012       | 0              | 0.02138       | 0.0266     | 517404          | 0.01034       | 0.01629        | 0.02066       |

**Supplementary Table 5: Sequences of primers used in this study.**

| Primer name     | Primer sequence            | Notes                                         |
|-----------------|----------------------------|-----------------------------------------------|
| Cell-CR1/2-F    | GAGAGGTTATGTGGCTTTACCA     | Forward Surveyor primer for CR1/2             |
| Cell-CR1-R      | AAAAATGCTTCCCACTTTGC       | Reverse Surveyor primer for CR1               |
| Cell-CR2-R      | CTCATTCTCATGCCTGGACA       | Reverse Surveyor primer for CR2               |
| Cell-CR3-F      | GAGTTTGGCTCAAATTGTTACTCTT  | Forward Surveyor primer for CR3               |
| Cell-CR3-R      | GGGAAATGGTCTAGGAGAGTAAAGT  | Reverse Surveyor primer for CR3               |
| Cell-CR4/31-F   | GTTTGGCTCAAATTGTTACTCTTCA  | Forward Surveyor primer for CR4 or CR31       |
| Cell-CR4/31-R   | GTGAGAGTAATGTGTTTGTGAGAG   | Reverse Surveyor primer for CR4 or CR31       |
| Cell-CR5-F      | CGGGCTTGGACAGAACTTAC       | Forward Surveyor primer for CR5               |
| Cell-CR5-R      | CTGCGTAGTGCCAAAAACAAA      | Reverse Surveyor primer for CR5               |
| Cell-CR6-F      | TAATTTCATTGAAGAGTGGCTGAA   | Forward Surveyor primer for CR6               |
| Cell-CR6-R      | AAGCCCTGTGTGGTAGTAGTCAGT   | Reverse Surveyor primer for CR6               |
| Cell-CR7-F      | TGAGTCATGTTGGATAACCACTCT   | Forward Surveyor primer for CR7               |
| Cell-CR7-R      | GAAGGTCAGGAACATACAATTCAA   | Reverse Surveyor primer for CR7               |
| Cell-CR10/11-F  | GATATGGGCATGTCACTTTCTATAG  | Forward Surveyor primer for CR10 or CR11      |
| Cell-CR10/11-R  | TGCTGTTGATTAATGGTTGATAGG   | Reverse Surveyor primer for CR10 or CR11      |
| Cell-CR12/13-F  | TTTTAAATTGCCATGTTGTGTC     | Forward Surveyor primer for CR12 or CR13      |
| Cell-CR12/13-R  | ATGAATAACCTAATGGGCAGAAAA   | Reverse Surveyor primer for CR12 or CR13      |
| Cell-CR14/15-F  | TCAAGTCGCTTCATTTTGTATAGAC  | Forward Surveyor primer for CR14 or CR15      |
| Cell-CR14/15-R  | CACAACAAAAACATATAGCCAAAGC  | Reverse Surveyor primer for CR14 or CR15      |
| Cell-CR16/17-F  | TGCTGCTAAAATAACACAATCAGT   | Forward Surveyor primer for CR16 or CR17      |
| Cell-CR16/17-R  | CTGTGCCTATTGTGGTTATCCTCT   | Reverse Surveyor primer for CR16 or CR17      |
| Cell-CR18/19-F  | ATTGATCTGCAATACATGTGGAGT   | Forward Surveyor primer for CR18 or CR19      |
| Cell-CR18/19-R  | TTTGCCTCTGCTATTACAGTATGG   | Reverse Surveyor primer for CR18 or CR19      |
| Cell-CR20/21-F  | TGTAGGGTGGTTGGCTAAAAATAAT  | Forward Surveyor primer for CR20 or CR21      |
| Cell-CR20/21-R  | TTTTTGCACAGTCAATAACACAAA   | Reverse Surveyor primer for CR20 or CR21      |
| Cell-CR22/23-F  | GGCTGGTCTCACAAATTGTACTTTA  | Forward Surveyor primer for CR22 or CR23      |
| Cell-CR22/23-R  | CATTATGGACTGAAAATCTCAGCA   | Reverse Surveyor primer for CR22 or CR23      |
| Cell-CR24/25-F  | ATCATCCTAGCCATAACACAATGA   | Forward Surveyor primer for CR24 or CR25      |
| Cell-CR24/25-R  | TTACGCTTTAACGTGATTTTCTGT   | Reverse Surveyor primer for CR24 or CR25      |
| Cell-CR26/27-F  | GGATTCAGAAGCTGTTTACGAAGT   | Forward Surveyor primer for CR26 or CR27      |
| Cell-CR26/27-R  | TTTAGCTGGATTGGAAAAACAAAT   | Reverse Surveyor primer for CR26 or CR27      |
| Cell-CR28/29-F  | AACTCACCCCATTTGGTATATT     | Forward Surveyor primer for CR28 or CR29      |
| Cell-CR28/29-R  | CCTTGTCCAAATACCGGAATACAT   | Reverse Surveyor primer for CR28 or CR29      |
| Cell-CR33-F     | CACATAATTCATGAACCTTGGCTTC  | Forward Surveyor primer for CR33              |
| Cell-CR33-R     | TAGTAGCTGGGGAGGAAGATACAG   | Reverse Surveyor primer for CR33              |
| Cell-CR34-F     | TTTTTGTTTTAAATTGCGACTGTGT  | Forward Surveyor primer for CR34              |
| Cell-CR34-R     | AGAAAAGGGGTTTTCTTTTACTT    | Reverse Surveyor primer for CR34              |
| Cell-CR35-F     | CATTGTGACTGGATGAGAAGAAAC   | Forward Surveyor primer for CR35              |
| Cell-CR35-R     | AACGGCTGTTATTAAGTCCCTCAG   | Reverse Surveyor primer for CR35              |
| Cell-CR36-F     | CAAGTCAGAAGTCACTTGTCTTGT   | Forward Surveyor primer for CR36              |
| Cell-CR36-R     | TTTTATGTGCAGGAATCAGTCTGT   | Reverse Surveyor primer for CR36              |
| Dys-E44-F       | TGGCGGCGTTTTTCATTAT        | Forward RT-PCR primer binding in exon 44      |
| Dys-E52-R       | TTCGATCCGTAATGATTGTTCTAGCC | Reverse RT-PCR primer binding in exon 52      |
| Dys-E60-R       | GGTCTCCAGAGTGTCTGAGG       | Reverse RT-PCR primer binding in exon 60      |
| CR3-Cell-OT1-F  | TGTGTGCTTCTGTACACATCATCT   | Forward Surveyor primer for CR3 off-target 1  |
| CR3-Cell-OT1-R  | AGATTTCAACCCTCAAAAACCTGAG  | Reverse Surveyor primer for CR3 off-target 1  |
| CR3-Cell-OT2-F  | TAAACTCTTTCTTTTCCGCAATTC   | Forward Surveyor primer for CR3 off-target 2  |
| CR3-Cell-OT2-R  | CAAGGTGACCTGCTACCTAAAAAT   | Reverse Surveyor primer for CR3 off-target 2  |
| CR3-Cell-OT3-F  | TATGACCAAGGCTATGTGTTCACT   | Forward Surveyor primer for CR3 off-target 3  |
| CR3-Cell-OT3-R  | ACAGCCTCTCTCCAGTAACATTCT   | Reverse Surveyor primer for CR3 off-target 3  |
| CR3-Cell-OT4-F  | TATTCTTGCAAGTGGTTTACATTT   | Forward Surveyor primer for CR3 off-target 4  |
| CR3-Cell-OT4-R  | ATATTTTAAGCCAAGACCACAA     | Reverse Surveyor primer for CR3 off-target 4  |
| CR3-Cell-OT5-F  | CTTTCAACTGTCTGTCTGATTGCT   | Forward Surveyor primer for CR3 off-target 5  |
| CR3-Cell-OT5-R  | AACAGCCTCTCTTCACTTGTCTCT   | Reverse Surveyor primer for CR3 off-target 5  |
| CR3-Cell-OT6-F  | CTCTGGAACCTGTCTGTCTTGA     | Forward Surveyor primer for CR3 off-target 6  |
| CR3-Cell-OT6-R  | CTTTCCTGCGTTCTCATGTTACTA   | Reverse Surveyor primer for CR3 off-target 6  |
| CR3-Cell-OT7-F  | CCTTATATCCGTATCGCTCACTCT   | Forward Surveyor primer for CR3 off-target 7  |
| CR3-Cell-OT7-R  | CATATCTGTCTAACTTCCGCACAC   | Reverse Surveyor primer for CR3 off-target 7  |
| CR3-Cell-OT8-F  | ACAGGTGTTATGTTGTCTGCATCT   | Forward Surveyor primer for CR3 off-target 8  |
| CR3-Cell-OT8-R  | ACTCCATTCCCAGATTAGTTATGC   | Reverse Surveyor primer for CR3 off-target 8  |
| CR3-Cell-OT9-F  | CTGTTTTCTTTGTGAGAGTGGAGA   | Forward Surveyor primer for CR3 off-target 9  |
| CR3-Cell-OT9-R  | TGTAAGGTGGTCAAACCTTGCTCTA  | Reverse Surveyor primer for CR3 off-target 9  |
| CR3-Cell-OT10-F | TTTTTCCTAGTACCCACAGATTTTT  | Forward Surveyor primer for CR3 off-target 10 |
| CR3-Cell-OT10-R | TCCCTGATTCTCTCATTGTGTGTTA  | Reverse Surveyor primer for CR3 off-target 10 |
| CR1-Cell-OT1-F  | TTGGGAACATCAGAGAAAGTATGA   | Forward Surveyor primer for CR1 off-target 1  |
| CR1-Cell-OT1-R  | ACAAATTACAGTCTCCTGGGAAAG   | Reverse Surveyor primer for CR1 off-target 1  |
| CR1-Cell-OT2-F  | AGTAGCTTACCTTGGCAGAGAAAA   | Forward Surveyor primer for CR1 off-target 2  |
| CR1-Cell-OT2-R  | TGACATACTGTTACCCTTTGCAGT   | Reverse Surveyor primer for CR1 off-target 2  |
| CR1-Cell-OT3-F  | GAAAGGCTCAGTGAATGTTTGT     | Forward Surveyor primer for CR1 off-target 3  |
| CR1-Cell-OT3-R  | CACCTGCATCATCTCAATTAATCAA  | Reverse Surveyor primer for CR1 off-target 3  |
| CR1-Cell-OT4-F  | CCCATATTCATGATTACCCACA     | Forward Surveyor primer for CR1 off-target 4  |
| CR1-Cell-OT4-R  | TATCAGAACGAGCACTAAAAGCAC   | Reverse Surveyor primer for CR1 off-target 4  |

|                   |                                           |                                                |
|-------------------|-------------------------------------------|------------------------------------------------|
| CR1-Cell-OT5-F    | TTGGGAGGCTGAGGTACAAG                      | Forward Surveyor primer for CR1 off-target 5   |
| CR1-Cell-OT5-R    | GAATGAAAAACAACAGAAGGTGA                   | Reverse Surveyor primer for CR1 off-target 5   |
| CR1-Cell-OT6-F    | CTCCTCATCTGTACCCCTCAATCT                  | Forward Surveyor primer for CR1 off-target 6   |
| CR1-Cell-OT6-R    | AGAGTGGCATCTAGTGTCAAGT                    | Reverse Surveyor primer for CR1 off-target 6   |
| CR1-Cell-OT7-F    | TACCAAAAGCTTCTCTGTTTACC                   | Forward Surveyor primer for CR1 off-target 7   |
| CR1-Cell-OT7-R    | GTAAGTTGGATGGCCTATTCTTTG                  | Reverse Surveyor primer for CR1 off-target 7   |
| CR1-Cell-OT8-F    | GAAGGAAATGCAAGGATACAAGAT                  | Forward Surveyor primer for CR1 off-target 8   |
| CR1-Cell-OT8-R    | TGATTGAAAGAATCATTCCAGAAA                  | Reverse Surveyor primer for CR1 off-target 8   |
| CR1-Cell-OT9-F    | TCAGAAGGAAAATTGAAATTGGTT                  | Forward Surveyor primer for CR1 off-target 9   |
| CR1-Cell-OT9-R    | CAGATGTGTTCTTCATCATTCCCT                  | Reverse Surveyor primer for CR1 off-target 9   |
| CR1-Cell-OT10-F   | TTCTCTTAGGGAAAGCTCTCAA                    | Forward Surveyor primer for CR1 off-target 10  |
| CR1-Cell-OT10-R   | GGGTATAGATCATATGGAGGGAA                   | Reverse Surveyor primer for CR1 off-target 10  |
| CR5-Cell-OT1-F    | AGATGATCTGCCACCTCAG                       | Forward Surveyor primer for CR5 off-target 1   |
| CR5-Cell-OT1-R    | CTTTCTTCTCATTAGTGGCAAT                    | Reverse Surveyor primer for CR5 off-target 1   |
| CR5-Cell-OT2-F    | ATGAATTGCAGATTGATGGTACTG                  | Forward Surveyor primer for CR5 off-target 2   |
| CR5-Cell-OT2-R    | TCTCACCAAGAACCAAAATTGTCTA                 | Reverse Surveyor primer for CR5 off-target 2   |
| CR5-Cell-OT3-F    | GTAGGATACCTTGGCAACAGCTT                   | Forward Surveyor primer for CR5 off-target 3   |
| CR5-Cell-OT3-R    | TTAACGAATTGTGAGATTGCTGT                   | Reverse Surveyor primer for CR5 off-target 3   |
| CR5-Cell-OT4-F    | TCAGAAAGTCAAGTAGCACACACA                  | Forward Surveyor primer for CR5 off-target 4   |
| CR5-Cell-OT4-R    | AGAAGCACACACTCAGGTAAAG                    | Reverse Surveyor primer for CR5 off-target 4   |
| CR5-Cell-OT5-F    | TCTTTGGGGGAATAAGACTAAAA                   | Forward Surveyor primer for CR5 off-target 5   |
| CR5-Cell-OT5-R    | TTTGGCATTATGGGAATAAAACT                   | Reverse Surveyor primer for CR5 off-target 5   |
| CR5-Cell-OT6-F    | ACTAATTCTGGTCAAGCCCATCA                   | Forward Surveyor primer for CR5 off-target 6   |
| CR5-Cell-OT6-R    | TTAAGACATCGGATGAACAGAAAG                  | Reverse Surveyor primer for CR5 off-target 6   |
| CR5-Cell-OT7-F    | AGAAGCTTTCTGACATGATCTGC                   | Forward Surveyor primer for CR5 off-target 7   |
| CR5-Cell-OT7-R    | TCAATTGCATTAGGACTTAGACCA                  | Reverse Surveyor primer for CR5 off-target 7   |
| CR5-Cell-OT8-F    | GTTAAATTACCTGTGAAGCCCTTG                  | Forward Surveyor primer for CR5 off-target 8   |
| CR5-Cell-OT8-R    | CGGAAACAGATCCACTTTATGAT                   | Reverse Surveyor primer for CR5 off-target 8   |
| CR5-Cell-OT9-F    | AAATCCACTGGAAACATCTTGAGT                  | Forward Surveyor primer for CR5 off-target 9   |
| CR5-Cell-OT9-R    | AGTCTCTTCAAGATCATGCCCTAT                  | Reverse Surveyor primer for CR5 off-target 9   |
| CR5-Cell-OT10-F   | GCTTGGTGGCACATACCTGTAG                    | Forward Surveyor primer for CR5 off-target 10  |
| CR5-Cell-OT10-R   | GGTAGGTAGATTGCTTGCTTGTT                   | Reverse Surveyor primer for CR5 off-target 10  |
| CR6-Cell-OT1-F    | AGCTCTCAGCAGAGTAGGGATTTA                  | Forward Surveyor primer for CR6 off-target 1   |
| CR6-Cell-OT1-R    | GTGAGTCTACTGCACCCCATC                     | Reverse Surveyor primer for CR6 off-target 1   |
| CR6-Cell-OT2-F    | TGACACTGTGAAGTCAATTCTGTC                  | Forward Surveyor primer for CR6 off-target 2   |
| CR6-Cell-OT2-R    | TCAAGAACTTGACAATGAGCAAAT                  | Reverse Surveyor primer for CR6 off-target 2   |
| CR6-Cell-OT3-F    | TATCCGATCCACTGTTGTGTGT                    | Forward Surveyor primer for CR6 off-target 3   |
| CR6-Cell-OT3-R    | CAGGAGACCCAAAACCACTTAC                    | Reverse Surveyor primer for CR6 off-target 3   |
| CR6-Cell-OT4-F    | TTGTTCTACAAATAGGGCTTCCTT                  | Forward Surveyor primer for CR6 off-target 4   |
| CR6-Cell-OT4-R    | TGTTAAGTTTGGGCTTATGTTCCCT                 | Reverse Surveyor primer for CR6 off-target 4   |
| CR6-Cell-OT5-F    | CACAAGTCTCACTGCACAACAT                    | Forward Surveyor primer for CR6 off-target 5   |
| CR6-Cell-OT5-R    | TGACCCATGATTATCTCTCTTTGA                  | Reverse Surveyor primer for CR6 off-target 5   |
| CR6-Cell-OT6-F    | TTCAGCTTCTGATTGGTTTTAATG                  | Forward Surveyor primer for CR6 off-target 6   |
| CR6-Cell-OT6-R    | CCAATTCCTAATTTCCCTACAG                    | Reverse Surveyor primer for CR6 off-target 6   |
| CR6-Cell-OT7-F    | ATCTCAGACCAGGAGGGAGAC                     | Forward Surveyor primer for CR6 off-target 7   |
| CR6-Cell-OT7-R    | CCTCAGGGTCAGTACATTTTCAG                   | Reverse Surveyor primer for CR6 off-target 7   |
| CR6-Cell-OT8-F    | TTCTTAGGACATTGCTCCACATAC                  | Forward Surveyor primer for CR6 off-target 8   |
| CR6-Cell-OT8-R    | GCAAACATAATGCAACTCGTAATC                  | Reverse Surveyor primer for CR6 off-target 8   |
| CR6-Cell-OT9-F    | GCAAGGGAGTCTGTGCTTTTG                     | Forward Surveyor primer for CR6 off-target 9   |
| CR6-Cell-OT9-R    | TCATTTAAGTGGCTGTTCTGTGTT                  | Reverse Surveyor primer for CR6 off-target 9   |
| CR6-Cell-OT10-F   | ACAAAACAGAGAGAAAAGGCAGAG                  | Forward Surveyor primer for CR6 off-target 10  |
| CR6-Cell-OT10-R   | GTTTTGATTTCTGGTGCCTACAG                   | Reverse Surveyor primer for CR6 off-target 10  |
| CR36-Cell-OT1-F   | ACTGAAGCTGAAGCCAGTC                       | Forward Surveyor primer for CR36 off-target 1  |
| CR36-Cell-OT1-R   | ACATGAGCTCTCAGGTTTCTGAC                   | Reverse Surveyor primer for CR36 off-target 1  |
| CR36-Cell-OT2-F   | TCAAACCTTAGATGGTCCCTATGTT                 | Forward Surveyor primer for CR36 off-target 2  |
| CR36-Cell-OT2-R   | GTACCCTGAAAATGTAGGGTGACT                  | Reverse Surveyor primer for CR36 off-target 2  |
| CR36-Cell-OT3-F   | CACCTCCCAAGTGAGGCAAT                      | Forward Surveyor primer for CR36 off-target 3  |
| CR36-Cell-OT3-R   | CTATACTTGGGGCTGACTTGCTAC                  | Reverse Surveyor primer for CR36 off-target 3  |
| CR36-Cell-OT4-F   | TCGTATAGGTTACTTTGGCTCAC                   | Forward Surveyor primer for CR36 off-target 4  |
| CR36-Cell-OT4-R   | AGGGATCTTACTCCTCAGTGTGT                   | Reverse Surveyor primer for CR36 off-target 4  |
| CR36-Cell-OT5-F   | TGTAGAAGTTGGAATATCCTGCTG                  | Forward Surveyor primer for CR36 off-target 5  |
| CR36-Cell-OT5-R   | GTCAACAATTTGATCTCAGGCTTC                  | Reverse Surveyor primer for CR36 off-target 5  |
| CR36-Cell-OT6-F   | CTCAGTACTAAAGATGGACGCTTG                  | Forward Surveyor primer for CR36 off-target 6  |
| CR36-Cell-OT6-R   | AATCATTTCACTTCCCAACAAT                    | Reverse Surveyor primer for CR36 off-target 6  |
| CR36-Cell-OT7-F   | GGGAATCACAGTAGATGTTGTCA                   | Forward Surveyor primer for CR36 off-target 7  |
| CR36-Cell-OT7-R   | AGACCAGGAGGTAAGAACATTTTG                  | Reverse Surveyor primer for CR36 off-target 7  |
| CR36-Cell-OT8-F   | CCACATAGAAAGAGACTTGCAGAA                  | Forward Surveyor primer for CR36 off-target 8  |
| CR36-Cell-OT8-R   | AGAGATGCCAAAAGAACAGTCAAT                  | Reverse Surveyor primer for CR36 off-target 8  |
| CR36-Cell-OT9-F   | TGTGCCCTTAGGCTATGTAACCTGT                 | Forward Surveyor primer for CR36 off-target 9  |
| CR36-Cell-OT9-R   | AAACCCTTGTAAACAAAATTACCA                  | Reverse Surveyor primer for CR36 off-target 9  |
| CR36-Cell-OT10-F  | TAACATGCATCAGAAGTCTTGTCTA                 | Forward Surveyor primer for CR36 off-target 10 |
| CR36-Cell-OT10-R  | GGAGACCAAGCTGCTAAAGTCA                    | Reverse Surveyor primer for CR36 off-target 10 |
| Cell-CR3-F-nested | GTGGTGccgqggGAGTTTGGCTCAAATTGTTACTCT<br>T | Nested PCR first round primers                 |
| Cell-CR3-R-nested | GTGGTGccgqggGGGAAATGGTCTAGGAGAGTAAA       | Nested PCR first round primers                 |

|                        | GT                                      |                                 |
|------------------------|-----------------------------------------|---------------------------------|
| Cell-CR1-F-nested      | GTGGTGccgchgGAGAGTTATGTGGCTTACCA        | Nested PCR first round primers  |
| Cell-CR1-R-nested      | GTGGTGccgchgCTCATTCTCATGCCTGGACA        | Nested PCR first round primers  |
| Cell-CR5-F-nested      | GTGGTGccgchgCGGGCTTGACAGAACTTAC         | Nested PCR first round primers  |
| Cell-CR5-R-nested      | GTGGTGccgchgCTGCGTAGTGC AAAACAAA        | Nested PCR first round primers  |
| Cell-CR6-F-nested      | GTGGTGccgchgTAATTTCAATGAAGATGGCTGAA     | Nested PCR first round primers  |
| Cell-CR6-R-nested      | GTGGTGccgchgAAGCCCTGTGGTAGTAGTCAAG<br>T | Nested PCR first round primers  |
| Cell-CR36-F-nested     | GTGGTGccgchgCAAGTCAGAAGTCACTTGCTTTGT    | Nested PCR first round primers  |
| Cell-CR36-R-nested     | GTGGTGccgchgTTTTATGTGCAGGAATCAGTCTGT    | Nested PCR first round primers  |
| CR3-Cell-OT1-F-nested  | GTGGTGccgchgTGTGTGCTTCTGTACACATCATCT    | Nested PCR first round primers  |
| CR3-Cell-OT1-R-nested  | GTGGTGccgchgAGATTTCAACCC TAAAACTGAG     | Nested PCR first round primers  |
| CR1-Cell-OT1-F-nested  | GTGGTGccgchgTTGGGAACATCAGAGAAAGTATGA    | Nested PCR first round primers  |
| CR1-Cell-OT1-R-nested  | GTGGTGccgchgACAAATTACAGTCTCCTGGGAAAG    | Nested PCR first round primers  |
| CR36-Cell-OT3-F-nested | GTGGTGccgchgCACTTCCCAAGTGAGGCAAT        | Nested PCR first round primers  |
| CR36-Cell-OT3-R-nested | GTGGTGccgchgCTATACTGGGGCTGACTTGCTAC     | Nested PCR first round primers  |
| CR3-P1/P3-F            | GTGGTGccgchgTTGGCTCTTTAGCTTGTGTTTT      | Nested PCR second round primers |
| CR3-P1/P3-R            | GTGGTGccgchgTGAGACTCCAAAGGCAATC         | Nested PCR second round primers |
| CR3-P1/P4-F            | GTGGTGccgchgTTGGCTCTTTAGCTTGTGTTTT      | Nested PCR second round primers |
| CR3-P1/P4-R            | GTGGTGccgchgACTGAGGGGTGATCTTGGTG        | Nested PCR second round primers |
| CR3-P2/P3-F            | GTGGTGccgchgGCAGAGAAAGCCAGTCGGTA        | Nested PCR second round primers |
| CR3-P2/P3-R            | GTGGTGccgchgTGAGACTCCAAAGGCAATC         | Nested PCR second round primers |
| CR3-P2/P4-F            | GTGGTGccgchgGCAGAGAAAGCCAGTCGGTA        | Nested PCR second round primers |
| CR3-P2/P4-R            | GTGGTGccgchgACTGAGGGGTGATCTTGGTG        | Nested PCR second round primers |
| CR1-P1/P5-F            | GTGGTGccgchgCCAGAGTTCTAGGGCAGAG         | Nested PCR second round primers |
| CR1-P1/P5-R            | GTGGTGccgchgAGCTAGTCCCACATTCCAC         | Nested PCR second round primers |
| CR1-P1/P6-F            | GTGGTGccgchgCCAGAGTTCTAGGGCAGAG         | Nested PCR second round primers |
| CR1-P1/P6-R            | GTGGTGccgchgGGTGGAGGGAAACTTTAGGC        | Nested PCR second round primers |
| CR1-P2/P5-F            | GTGGTGccgchgCTCATTCTCATGCCTGGACA        | Nested PCR second round primers |
| CR1-P2/P5-R            | GTGGTGccgchgAGCTAGTCCCACATTCCAC         | Nested PCR second round primers |
| CR1-P2/P6-F            | GTGGTGccgchgTCTCATGCCTGGACAAGTAACT      | Nested PCR second round primers |
| CR1-P2/P6-R            | GTGGTGccgchgGGTGGAGGGAAACTTTAGGC        | Nested PCR second round primers |
| CR5-P3/P5-F            | GTGGTGccgchgGGCTTGACAGAACTTACCG         | Nested PCR second round primers |
| CR5-P3/P5-R            | GTGGTGccgchgCACCACTGTCTGCCTAAGGA        | Nested PCR second round primers |
| CR5-P4/P6-F            | GTGGTGccgchgGGCTTGACAGAACTTACCG         | Nested PCR second round primers |
| CR5-P4/P6-R            | GTGGTGccgchgGGTGGAGGGAAACTTTAGGC        | Nested PCR second round primers |
| CR5-P3/P5-F            | GTGGTGccgchgCGTAGTGCCAAAACAAACAGT       | Nested PCR second round primers |
| CR5-P3/P5-R            | GTGGTGccgchgCACCACTGTCTGCCTAAGGA        | Nested PCR second round primers |
| CR5-P4/P6-F            | GTGGTGccgchgCGTAGTGCCAAAACAAACAGT       | Nested PCR second round primers |
| CR5-P4/P6-R            | GTGGTGccgchgGGTGGAGGGAAACTTTAGGC        | Nested PCR second round primers |
| CR6-P1/P5-F            | GTGGTGccgchgGCGAGGGCCTACTTGATATG        | Nested PCR second round primers |
| CR6-P1/P5-R            | GTGGTGccgchgCTTCCCAAGTGAGGCAATGC        | Nested PCR second round primers |
| CR6-P1/P6-F            | GTGGTGccgchgACGTTTTGTGCTGCTGTAACA       | Nested PCR second round primers |
| CR6-P1/P6-R            | GTGGTGccgchgCTGCAGGCACATTCTTTCC         | Nested PCR second round primers |
| CR6-P2/P5-F            | GTGGTGccgchgGCCCTGTGTGGTAGTAGTCA        | Nested PCR second round primers |
| CR6-P2/P5-R            | GTGGTGccgchgCTTCCCAAGTGAGGCAATGC        | Nested PCR second round primers |
| CR6-P2/P6-F            | GTGGTGccgchgCAGTATTAAGGGGTGGGAGCT       | Nested PCR second round primers |
| CR6-P2/P6-R            | GTGGTGccgchgTCTCTTCTCACACAGCTGA         | Nested PCR second round primers |
| CR36-P3/P5-F           | GTGGTGccgchgGGAGCTTGAGGGGAAGAGAA        | Nested PCR second round primers |
| CR36-P3/P5-R           | GTGGTGccgchgCTTCCCAAGTGAGGCAATGC        | Nested PCR second round primers |
| CR36-P4/P6-F           | GTGGTGccgchgATGGATGGGGAAGACTGG          | Nested PCR second round primers |
| CR36-P4/P6-R           | GTGGTGccgchgCTGCAGGCACATTCTTTCC         | Nested PCR second round primers |
| CR36-P3/P5-F           | GTGGTGccgchgGGATGAAACAGGGCAGGAAC        | Nested PCR second round primers |
| CR36-P3/P5-R           | GTGGTGccgchgTTCCCAAGTGAGGCAATGC         | Nested PCR second round primers |
| CR36-P4/P6-F           | GTGGTGccgchgTTGCGAGGCCATGATGAGG         | Nested PCR second round primers |
| CR36-P4/P6-R           | GTGGTGccgchgCGACAGCCAAAACAGCCG          | Nested PCR second round primers |

**Supplementary Table 6:** Sequences of primers used to amplify targets for deep sequencing.

|                   |                                                              |
|-------------------|--------------------------------------------------------------|
| DCR1-ON-miseq-F   | TCGTCGGCAGCGTCAGATGTGTATAAGAGACAGTGGCCAGTTTACTAACAATCTGAA    |
| DCR1-ON-miseq-R   | GTCTCGTGGGCTCGGAGATGTGTATAAGAGACAGTTTCTGATTTAAAATCCCTTGAA    |
| DCR1-OT1-miseq-F  | TCGTCGGCAGCGTCAGATGTGTATAAGAGACAGATATCTGTGGCTTGATTTTCCTC     |
| DCR1-OT1-miseq-R  | GTCTCGTGGGCTCGGAGATGTGTATAAGAGACAGGAACCTGTTTGAAGCCTGATATTT   |
| DCR1-OT2-miseq-F  | TCGTCGGCAGCGTCAGATGTGTATAAGAGACAGACTCAGAATTTAAAAGGGGAAGGT    |
| DCR1-OT2-miseq-R  | GTCTCGTGGGCTCGGAGATGTGTATAAGAGACAGCTCAAAGCTGAAAGACCCTCTAAG   |
| DCR1-OT3-miseq-F  | TCGTCGGCAGCGTCAGATGTGTATAAGAGACAGGACACAGCTAGACTCCATCTCAA     |
| DCR1-OT3-miseq-R  | GTCTCGTGGGCTCGGAGATGTGTATAAGAGACAGATCAAGTCAGAAGTGAGCTCTGG    |
| DCR1-OT4-miseq-F  | TCGTCGGCAGCGTCAGATGTGTATAAGAGACAGATATGTTGTTCTCTGCTCATCCTG    |
| DCR1-OT4-miseq-R  | GTCTCGTGGGCTCGGAGATGTGTATAAGAGACAGCATGAGTGACAGCTCTGAAACC     |
| DCR1-OT5-miseq-F  | TCGTCGGCAGCGTCAGATGTGTATAAGAGACAGAGCTTGAAAGATTGAGCATAAA      |
| DCR1-OT5-miseq-R  | GTCTCGTGGGCTCGGAGATGTGTATAAGAGACAGAGATTACTCACTGCCATTTAACGA   |
| DCR1-OT6-miseq-F  | TCGTCGGCAGCGTCAGATGTGTATAAGAGACAGATACTGGTAGGGGATGCTGGAAG     |
| DCR1-OT6-miseq-R  | GTCTCGTGGGCTCGGAGATGTGTATAAGAGACAGACATTTTCTTGTCTGCTTTATCA    |
| DCR1-OT7-miseq-F  | TCGTCGGCAGCGTCAGATGTGTATAAGAGACAGATAATGTCTGGTCATACCCTTGGT    |
| DCR1-OT7-miseq-R  | GTCTCGTGGGCTCGGAGATGTGTATAAGAGACAGGGCAGTTTCTCCTCTACTCTTAGC   |
| DCR1-OT8-miseq-F  | TCGTCGGCAGCGTCAGATGTGTATAAGAGACAGTGACAAAGAGGCTAAAAACAACG     |
| DCR1-OT8-miseq-R  | GTCTCGTGGGCTCGGAGATGTGTATAAGAGACAGATCATTTTTCTTTGACCTGAAAT    |
| DCR1-OT9-miseq-F  | TCGTCGGCAGCGTCAGATGTGTATAAGAGACAGCAAATGAACATCTCTGTCTCCAAG    |
| DCR1-OT9-miseq-R  | GTCTCGTGGGCTCGGAGATGTGTATAAGAGACAGAGAATTGGGGTGATCCATCACT     |
| DCR1-OT10-miseq-F | TCGTCGGCAGCGTCAGATGTGTATAAGAGACAGCTTTTTCCAGTGTATGTGAGATGC    |
| DCR1-OT10-miseq-R | GTCTCGTGGGCTCGGAGATGTGTATAAGAGACAGTGGAGGGAAGAGTAGACATAGTGA   |
| DCR3-ON-miseq-F   | TCGTCGGCAGCGTCAGATGTGTATAAGAGACAGAAATGGCTCTTTAGCTTGTGTTTC    |
| DCR3-ON-miseq-R   | GTCTCGTGGGCTCGGAGATGTGTATAAGAGACAGATTTCTAGTTTGGAGATGGCAGTT   |
| DCR3-OT1-miseq-F  | TCGTCGGCAGCGTCAGATGTGTATAAGAGACAGAAATCCAGGGTCAAGTGACTTACTA   |
| DCR3-OT1-miseq-R  | GTCTCGTGGGCTCGGAGATGTGTATAAGAGACAGGTGTACACAAGAAGGTGGGAGTC    |
| DCR3-OT2-miseq-F  | TCGTCGGCAGCGTCAGATGTGTATAAGAGACAGAGCTAATGGCAGTGTCTATGGAA     |
| DCR3-OT2-miseq-R  | GTCTCGTGGGCTCGGAGATGTGTATAAGAGACAGGGCTCTTACCTGCCTACTGTTA     |
| DCR3-OT3-miseq-F  | TCGTCGGCAGCGTCAGATGTGTATAAGAGACAGTAGTATCCAAGCACATTTCTCCAG    |
| DCR3-OT3-miseq-R  | GTCTCGTGGGCTCGGAGATGTGTATAAGAGACAGCATCCTGTTTTAAATCGCTCTTTT   |
| DCR3-OT4-miseq-F  | TCGTCGGCAGCGTCAGATGTGTATAAGAGACAGCACAAACATTTGGCTCATTTTATTT   |
| DCR3-OT4-miseq-R  | GTCTCGTGGGCTCGGAGATGTGTATAAGAGACAGAGAATTGTGTAAACCCAGGAGGT    |
| DCR3-OT5-miseq-F  | TCGTCGGCAGCGTCAGATGTGTATAAGAGACAGGcaacatacagagatatgtggtacaaa |
| DCR3-OT5-miseq-R  | GTCTCGTGGGCTCGGAGATGTGTATAAGAGACAGTgcttaggatttctgtttgacttc   |
| DCR3-OT6-miseq-F  | TCGTCGGCAGCGTCAGATGTGTATAAGAGACAGTTAGCTGTGATAGAAATCCCTTGG    |
| DCR3-OT6-miseq-R  | GTCTCGTGGGCTCGGAGATGTGTATAAGAGACAGAAATTTGTGGATCAAAGTGGGTAT   |
| DCR3-OT7-miseq-F  | TCGTCGGCAGCGTCAGATGTGTATAAGAGACAGATACACACCACAGGGCATACTTT     |
| DCR3-OT7-miseq-R  | GTCTCGTGGGCTCGGAGATGTGTATAAGAGACAGAGGGTGAGTGAATGAGCTATTTG    |
| DCR3-OT8-miseq-F  | TCGTCGGCAGCGTCAGATGTGTATAAGAGACAGGGTTTCAGCTCAAAGCAGAACTA     |
| DCR3-OT8-miseq-R  | GTCTCGTGGGCTCGGAGATGTGTATAAGAGACAGAAATGACACCTTTCTGATGGTCTTT  |

|                   |                                                            |
|-------------------|------------------------------------------------------------|
| DCR3-OT9-miseq-F  | TCGTCGGCAGCGTCAGATGTGTATAAGAGACAGCATATCTGCATTTGGTCTTCAGTC  |
| DCR3-OT9-miseq-R  | GTCTCGTGGGCTCGGAGATGTGTATAAGAGACAGAGACCTGGTTCAAAAAGATTCTG  |
| DCR3-OT10-miseq-F | TCGTCGGCAGCGTCAGATGTGTATAAGAGACAGTAGGCTAGTGTATTCCCAAAGAG   |
| DCR3-OT10-miseq-R | GTCTCGTGGGCTCGGAGATGTGTATAAGAGACAGTAACAAAACCTGTATTTCCCTTCC |
| DCR5-ON-miseq-F   | TCGTCGGCAGCGTCAGATGTGTATAAGAGACAGATGAAGATTTCCACCAATCACTT   |
| DCR5-ON-miseq-R   | GTCTCGTGGGCTCGGAGATGTGTATAAGAGACAGATGGCTACTTTTGTATTTCATT   |
| DCR5-OT1-miseq-F  | TCGTCGGCAGCGTCAGATGTGTATAAGAGACAGATACTCACTGTGCTAGCCACTACC  |
| DCR5-OT1-miseq-R  | GTCTCGTGGGCTCGGAGATGTGTATAAGAGACAGTTGTGGAGGAGATTCTATTGAC   |
| DCR5-OT2-miseq-F  | TCGTCGGCAGCGTCAGATGTGTATAAGAGACAGTATAGCTAATCCCCTTGCAACCT   |
| DCR5-OT2-miseq-R  | GTCTCGTGGGCTCGGAGATGTGTATAAGAGACAGTAGAAGAAAGGGAGAAACGGACAG |
| DCR5-OT3-miseq-F  | TCGTCGGCAGCGTCAGATGTGTATAAGAGACAGAGTGTGCTGGACATTTAAACCAT   |
| DCR5-OT3-miseq-R  | GTCTCGTGGGCTCGGAGATGTGTATAAGAGACAGGGAACTTTTATTGGAACATGGAGT |
| DCR5-OT4-miseq-F  | TCGTCGGCAGCGTCAGATGTGTATAAGAGACAGCAAGGGCTTATTAATGGAGCTTA   |
| DCR5-OT4-miseq-R  | GTCTCGTGGGCTCGGAGATGTGTATAAGAGACAGCGAGTCTCATCCACATCTTAGC   |
| DCR5-OT5-miseq-F  | TCGTCGGCAGCGTCAGATGTGTATAAGAGACAGCCATCTACCTACTTCTTTTGTGG   |
| DCR5-OT5-miseq-R  | GTCTCGTGGGCTCGGAGATGTGTATAAGAGACAGGACTGTAGCTGTCAAATGAGGATG |
| DCR5-OT6-miseq-F  | TCGTCGGCAGCGTCAGATGTGTATAAGAGACAGcaggggaacggattatgtgat     |
| DCR5-OT6-miseq-R  | GTCTCGTGGGCTCGGAGATGTGTATAAGAGACAGGtaagacatcggatgaacagaaag |
| DCR5-OT7-miseq-F  | TCGTCGGCAGCGTCAGATGTGTATAAGAGACAGCCACACAAGATGCAGATGTTAAT   |
| DCR5-OT7-miseq-R  | GTCTCGTGGGCTCGGAGATGTGTATAAGAGACAGCTAATCAAAGCCACCCTGTACTT  |
| DCR5-OT8-miseq-F  | TCGTCGGCAGCGTCAGATGTGTATAAGAGACAGCCAGAGCCTCATTCTATGGATACT  |
| DCR5-OT8-miseq-R  | GTCTCGTGGGCTCGGAGATGTGTATAAGAGACAGAAACGGAAAACAGATCCACTTTAT |
| DCR5-OT9-miseq-F  | TCGTCGGCAGCGTCAGATGTGTATAAGAGACAGCATCTGAGGAACTCAGCCTGTC    |
| DCR5-OT9-miseq-R  | GTCTCGTGGGCTCGGAGATGTGTATAAGAGACAGATGAAGGAACAGGGTGTGGTGT   |
| DCR5-OT10-miseq-F | TCGTCGGCAGCGTCAGATGTGTATAAGAGACAGTAACCCATATGCCTACACACAATC  |
| DCR5-OT10-miseq-R | GTCTCGTGGGCTCGGAGATGTGTATAAGAGACAGACACAGTGCAGAAGTAAAAGGT   |
| DCR6-ON-miseq-F   | TCGTCGGCAGCGTCAGATGTGTATAAGAGACAGGATTAGAGGGCAAGAAAGATCAAA  |
| DCR6-ON-miseq-R   | GTCTCGTGGGCTCGGAGATGTGTATAAGAGACAGGAAATTAATTGCCATTGTGACAG  |
| DCR6-OT1-miseq-F  | TCGTCGGCAGCGTCAGATGTGTATAAGAGACAGAGTTAGATGCAAGTGAGACGTCAG  |
| DCR6-OT1-miseq-R  | GTCTCGTGGGCTCGGAGATGTGTATAAGAGACAGCTGTCTGGAATTTGCCTTAAAAA  |
| DCR6-OT2-miseq-F  | TCGTCGGCAGCGTCAGATGTGTATAAGAGACAGTTTGTTCCTGCTGTAGAAGAGAGA  |
| DCR6-OT2-miseq-R  | GTCTCGTGGGCTCGGAGATGTGTATAAGAGACAGCACTGTTTCACAGGATTATTGCTT |
| DCR6-OT3-miseq-F  | TCGTCGGCAGCGTCAGATGTGTATAAGAGACAGACTGCAGCGTTTTCTTTCTTTCT   |
| DCR6-OT3-miseq-R  | GTCTCGTGGGCTCGGAGATGTGTATAAGAGACAGCATCCTTCTAGGGGGTTTAGTCAG |
| DCR6-OT4-miseq-F  | TCGTCGGCAGCGTCAGATGTGTATAAGAGACAGGTCCTCTCTGTCCAAGCTCTGT    |
| DCR6-OT4-miseq-R  | GTCTCGTGGGCTCGGAGATGTGTATAAGAGACAGTGTCAAGCTGCTGGTTGACTT    |
| DCR6-OT5-miseq-F  | TCGTCGGCAGCGTCAGATGTGTATAAGAGACAGGAGGAAGGAAAGCTGCCTCTAGT   |
| DCR6-OT5-miseq-R  | GTCTCGTGGGCTCGGAGATGTGTATAAGAGACAGCACCTTCTTTCTCTCTGAGTGT   |
| DCR6-OT6-miseq-F  | TCGTCGGCAGCGTCAGATGTGTATAAGAGACAGtttttctgtggtggaacacct     |
| DCR6-OT6-miseq-R  | GTCTCGTGGGCTCGGAGATGTGTATAAGAGACAGagcctgtgtaaacaaaccagagt  |
| DCR6-OT7-miseq-F  | TCGTCGGCAGCGTCAGATGTGTATAAGAGACAGctttttgatgtcctgagtgtgaac  |



|                    |                                                            |
|--------------------|------------------------------------------------------------|
| DCR6-OT7-miseq-R   | GTCTCGTGGGCTCGGAGATGTGTATAAGAGACAGtgaccaccctctgctgttaag    |
| DCR6-OT8-miseq-F   | TCGTCGGCAGCGTCAGATGTGTATAAGAGACAGGGGACACTGAAGGGGAATGTTACTG |
| DCR6-OT8-miseq-R   | GTCTCGTGGGCTCGGAGATGTGTATAAGAGACAGCTCATACCAACAGACACAGATTT  |
| DCR6-OT9-miseq-F   | TCGTCGGCAGCGTCAGATGTGTATAAGAGACAGAaatggatggtgtgctctgt      |
| DCR6-OT9-miseq-R   | GTCTCGTGGGCTCGGAGATGTGTATAAGAGACAGgttctgtgtttcttggtgag     |
| DCR6-OT10-miseq-F  | TCGTCGGCAGCGTCAGATGTGTATAAGAGACAGcagggtacccaagctagtgtgagtc |
| DCR6-OT10-miseq-R  | GTCTCGTGGGCTCGGAGATGTGTATAAGAGACAGAactaaaccaaggttctctgcac  |
| DCR36-ON-miseq-F   | TCGTCGGCAGCGTCAGATGTGTATAAGAGACAGatctatgcttaaccctgctctg    |
| DCR36-ON-miseq-R   | GTCTCGTGGGCTCGGAGATGTGTATAAGAGACAGcagccctataaatcctttacacc  |
| DCR36-OT1-miseq-F  | TCGTCGGCAGCGTCAGATGTGTATAAGAGACAGagtgtgctgtgaggctgagcac    |
| DCR36-OT1-miseq-R  | GTCTCGTGGGCTCGGAGATGTGTATAAGAGACAGacatgagctctcaggttctgac   |
| DCR36-OT2-miseq-F  | TCGTCGGCAGCGTCAGATGTGTATAAGAGACAGcagctaggctggtgtcttctt     |
| DCR36-OT2-miseq-R  | GTCTCGTGGGCTCGGAGATGTGTATAAGAGACAGagtttttgaagctccagttcag   |
| DCR36-OT3-miseq-F  | TCGTCGGCAGCGTCAGATGTGTATAAGAGACAGtaatgtgagtcagctgaaatatcc  |
| DCR36-OT3-miseq-R  | GTCTCGTGGGCTCGGAGATGTGTATAAGAGACAGctatactggggctgacttgctac  |
| DCR36-OT4-miseq-F  | TCGTCGGCAGCGTCAGATGTGTATAAGAGACAGTGCCAAATCAATTCACACTTTT    |
| DCR36-OT4-miseq-R  | GTCTCGTGGGCTCGGAGATGTGTATAAGAGACAGAGTGAAAATATTGGGTTTGTCTC  |
| DCR36-OT5-miseq-F  | TCGTCGGCAGCGTCAGATGTGTATAAGAGACAGacaggtcaattggctggtttct    |
| DCR36-OT5-miseq-R  | GTCTCGTGGGCTCGGAGATGTGTATAAGAGACAGaggactgaaaacatcccagcag   |
| DCR36-OT6-miseq-F  | TCGTCGGCAGCGTCAGATGTGTATAAGAGACAGagtgtgtaggtccagcaaatga    |
| DCR36-OT6-miseq-R  | GTCTCGTGGGCTCGGAGATGTGTATAAGAGACAGAaacaatttcagactcccaaatcc |
| DCR36-OT7-miseq-F  | TCGTCGGCAGCGTCAGATGTGTATAAGAGACAGattttaccagcacaggtcaagc    |
| DCR36-OT7-miseq-R  | GTCTCGTGGGCTCGGAGATGTGTATAAGAGACAGataagccaggagacaatcacctaa |
| DCR36-OT8-miseq-F  | TCGTCGGCAGCGTCAGATGTGTATAAGAGACAGaggaagagtaagtcaccatcctg   |
| DCR36-OT8-miseq-R  | GTCTCGTGGGCTCGGAGATGTGTATAAGAGACAGAaggaggacaaaatattggaagc  |
| DCR36-OT9-miseq-F  | TCGTCGGCAGCGTCAGATGTGTATAAGAGACAGTTTCAAATGAGGAAACAAGATCAA  |
| DCR36-OT9-miseq-R  | GTCTCGTGGGCTCGGAGATGTGTATAAGAGACAGAACAAGGAGAAAACAAGATTTCG  |
| DCR36-OT10-miseq-F | TCGTCGGCAGCGTCAGATGTGTATAAGAGACAGactatctaaattaaacgggcaca   |
| DCR36-OT10-miseq-R | GTCTCGTGGGCTCGGAGATGTGTATAAGAGACAGacgcacatcttctcaagtgct    |
